# 1 Microscopy-based assay for semi- 2 quantitative detection of SARS-CoV-2 3 specific antibodies in human sera

4 **Authors:** Constantin Pape<sup>1,2,#</sup>, Roman Remme<sup>1,#</sup>, Adrian Wolny<sup>1,2</sup>, Sylvia Olberg<sup>3</sup>, Steffen Wolf<sup>1</sup>,  
5 Lorenzo Cerrone<sup>1</sup>, Mirko Cortese<sup>4</sup>, Severina Klaus<sup>5</sup>, Bojana Lucic<sup>6</sup>, Stephanie Ullrich<sup>3</sup>, Maria  
6 Anders-Össwein<sup>3</sup>, Stefanie Wolf<sup>3</sup>, Berati Cerikan<sup>4</sup>, Christopher J. Neufeldt<sup>4</sup>, Markus Ganter<sup>5</sup>,  
7 Paul Schnitzler<sup>3</sup>, Uta Merle<sup>7</sup>, Marina Lusic<sup>6,9</sup>, Steeve Boulant<sup>3,8</sup>, Megan Stanifer<sup>4,8</sup>, Ralf  
8 Bartenschlager<sup>4,9</sup>, Fred A. Hamprecht<sup>1</sup>, Anna Kreshuk<sup>2</sup>, Christian Tischer<sup>2</sup>, Hans-Georg  
9 Kräusslich<sup>3,9</sup>, Barbara Müller<sup>3,\*</sup> and Vibor Laketa<sup>3,9,\*</sup>

10

## 11 **Affiliations:**

12 <sup>1</sup>HCI/IWR, Heidelberg University, Heidelberg, Germany.

13 <sup>2</sup>European Molecular Biology Laboratory, Heidelberg, Germany.

14 <sup>3</sup>Department of Infectious Diseases, Virology, University Hospital Heidelberg, Heidelberg,  
15 Germany.

16 <sup>4</sup>Department of Infectious Diseases, Molecular Virology, University Hospital Heidelberg,  
17 Heidelberg, Germany.

18 <sup>5</sup>Department of Infectious Diseases, Parasitology, University Hospital Heidelberg, Heidelberg,  
19 Germany.

20 <sup>6</sup>Department of Infectious Diseases, Integrative Virology, University Hospital Heidelberg,  
21 Heidelberg, Germany.

22 <sup>7</sup>Department of Gastroenterology and Hepatology, University Hospital of Heidelberg,  
23 Heidelberg, Germany.

24 <sup>8</sup>Research Group “Cellular polarity and viral infection”, German Cancer Research Center  
25 (DKFZ), Heidelberg, Germany

26 <sup>9</sup>German Center for Infection Research, Heidelberg, Germany.

27 \*Corresponding authors: Vibor Laketa, Department of Infectious Diseases, Virology, University  
28 Hospital Heidelberg, Im Neuenheimer Feld 344, 69120 Heidelberg, Germany, Email:  
29 [vibor.laketa@med.uni-heidelberg.de](mailto:vibor.laketa@med.uni-heidelberg.de) and Barbara Müller, Department of Infectious Diseases,  
30 Virology, University Hospital Heidelberg, Im Neuenheimer Feld 344, 69120 Heidelberg,  
31 Germany, Email: [barbara.mueller@med.uni-heidelberg.de](mailto:barbara.mueller@med.uni-heidelberg.de)

32 #equal contribution

33

34 **Subtitle:** A semi-quantitative, high throughput, microscopy-based assay expands existing  
35 approaches to measure SARS-CoV-2 specific antibody levels in human sera

## 36 Abstract

37 Emergence of the novel pathogenic coronavirus SARS-CoV-2 and its rapid pandemic  
38 spread presents numerous questions and challenges that demand immediate attention. Among  
39 these is the urgent need for a better understanding of humoral immune response against the  
40 virus as a basis for developing public health strategies to control viral spread. For this, sensitive,  
41 specific and quantitative serological assays are required. Here we describe the development of  
42 a semi-quantitative high-content microscopy-based assay for detection of three major classes  
43 (IgG, IgA and IgM) of SARS-CoV-2 specific antibodies in human samples. The possibility to  
44 detect antibodies against the entire viral proteome together with a robust semi-automated image  
45 analysis workflow resulted in specific, sensitive and unbiased assay which complements the  
46 portfolio of SARS-CoV-2 serological assays. The procedure described here has been used for  
47 clinical studies and provides a general framework for the application of quantitative high-  
48 throughput microscopy to rapidly develop serological assays for emerging virus infections.

49

## 50 Keywords:

51 SARS-CoV-2, antibody, serological test, quantitative microscopy, immunofluorescence,  
52 machine learning image analysis

53

## 54 1. Introduction

55 The recent emergence of the novel pathogenic coronavirus SARS-CoV-2 <sup>[1-3]</sup> and the  
56 rapid pandemic spread of the virus has dramatic consequences in all affected countries. In the  
57 absence of a protective vaccine or a causative antiviral therapy for COVID-19 patients, testing  
58 for SARS-CoV-2 infection and tracking of transmission and outbreak events are of paramount  
59 importance to control viral spread and avoid the overload of healthcare systems. The sequence  
60 of the viral genome became publicly available only weeks after the initial reports on COVID-19

61 via the community online resource *virological.org* and allowed rapid development of reliable and  
62 standardized quantitative RT-PCR (qPCR) based tests for direct virus detection in  
63 nasopharyngeal swab specimens <sup>[4-6]</sup>. These tests are the key to identify acutely infected  
64 individuals and monitor virus load as a basis for the implementation of quarantine measures and  
65 treatment decisions.

66 In response to the initial wave of COVID-19 infection many countries implemented more  
67 or less severe lockdown strategies, resulting in a gradual decrease in the rate of new infections  
68 and deaths <sup>[7]</sup>. With gradual release of these lockdown strategies, monitoring and tracking of  
69 SARS-CoV-2 specific antibody levels becomes highly important. Many critical aspects of the  
70 humoral immune response against SARS-CoV-2 are currently not well understood <sup>[8]</sup>. In addition,  
71 levels of infection in the general population in different areas remain largely unknown due to  
72 proportion of undocumented cases arising from asymptomatic individuals <sup>[9,10]</sup> which had not  
73 been subjected to RNA testing, or to limitations in testing capacity especially in areas of relatively  
74 high prevalence. Public health control strategies aiming at regulating human mobility and social  
75 behaviour in order to suppress the infection rate will have to take into account the proportion of  
76 seropositive individuals in the general population, or in specific population groups <sup>[11]</sup>. Information  
77 on the level of antiviral antibodies, as well as on the serological response against different viral  
78 proteins, is also a key element of understanding the nature, development and durability of the  
79 antiviral immune response. Therefore, specific, sensitive and reliable methods for the  
80 quantitative detection of virus specific antibodies in human specimens are urgently needed from  
81 the beginning of an emerging pandemic.

82 Compared to approaches for direct virus diagnostics by PCR, development of test  
83 systems for detection of SARS-CoV-2 specific antibodies proved to be more challenging. In  
84 particular, cross reactivity of antibodies against circulating common cold coronaviruses (strains  
85 OC43, NL63, 229E and HKU1) are of concern in this respect as it was observed in case of  
86 serological tests developed for closely related SARS-CoV and MERS-CoV <sup>[12]</sup>. Developments in  
87 the past months yielded well validated, commercially available ELISA or  
88 (electro)chemoluminescence-based kits for SARS-CoV-2 serological diagnostics. However,  
89 initially marketed test kits underwent a very rapid development and approval process due to the  
90 emergency of the situation, with low numbers of samples used for validation; consequently,  
91 sensitivity and specificity of the test systems often failed to meet the practical requirements <sup>[13]</sup>.  
92 Furthermore, the disruption of supply chains and high demand for tests during pandemic  
93 situations can lead to shortage of commercially available test kits and/or required reagents, as

94 witnessed in the early phases of the ongoing SARS-CoV-2 pandemic. Thus, complementary  
95 strategies to test for antiviral antibodies that can be rapidly deployed in situations where  
96 commercially available kits are either not yet developed or not available are an important addition  
97 to the diagnostic toolkit.

98 Immunofluorescence (IF) using virus infected cells as a specimen is a classical  
99 serological approach in virus diagnostics and has been applied to coronavirus infections,  
100 including the closely related virus SARS-CoV [14–16]. The advantages of IF are (i) that it does not  
101 depend on specific diagnostic reagent kits or instruments, (ii) that the specimen contains all viral  
102 antigens expressed in the cellular context and (iii) that the method has the potential to provide  
103 high information content (differentiation of staining patterns and intensities due to reactivity  
104 against various viral proteins). A mayor disadvantage of the IF approach as it is typically used in  
105 serological testing is its limited throughput capacity due to the involvement of manual microscopy  
106 handling steps and sample evaluation based on visual inspection of micrographs. Furthermore,  
107 visual classification is subjective and thus not well standardized and yields only binary results.  
108 Here, we address those limitations, making use of advanced automated microscopy and image  
109 analysis strategies developed for basic research. We present the establishment and validation  
110 of a semi-quantitative, semi-automated workflow for SARS-CoV-2 specific antibody detection.  
111 With its 96-well format, semi-automated microscopy and automated image analysis workflow it  
112 combines advantages of IF with a reliable and objective semi-quantitative readout and high  
113 throughput compatibility. The protocol described here was developed in response to the  
114 emergence of SARS-CoV-2, but it represents a general approach that can be adapted for the  
115 study of other viral infections and is suitable for rapid deployment to support diagnostics of  
116 emerging viral infections in the future.

## 117 2. Results

### 118 2.1 Setup of the IF assay for SARS-CoV-2 antibody detection

119 We decided to use cells infected with SARS-CoV-2 as samples for our IF analyses,  
120 since this setup provides the best chance for detection of antibodies targeted at the different  
121 viral proteins expressed in the host cell context. African green monkey kidney epithelial cells  
122 (VeroE6 cell line) have been used for infection with SARS-CoV-2, virus production and IF<sup>[3,17]</sup>.  
123 In preparation for our analyses we compared different cell lines for use in infection and IF

124 experiments, but all tested cell lines were found to be inferior to VeroE6 cells for our purposes  
125 (see Materials and Methods and Fig. S1). All following experiments were thus carried out using  
126 the VeroE6 cell line.

127           In order to allow for clear identification of positive reactivity in spite of a variable and  
128 sometimes high nonspecific background from human sera, our strategy involves a direct  
129 comparison of the IF signal from infected and non-infected cells in the same sample. Preferential  
130 antibody binding to infected compared to non-infected cells indicates the presence of specific  
131 SARS-CoV-2 antibodies in the examined serum. Under our conditions, infection rates of ~40-  
132 80% of the cell population were achieved, allowing for a comparison of infected and non-infected  
133 cells in the same well of the test plate. An antibody that detects dsRNA produced during viral  
134 replication was used to distinguish infected from non-infected cells within the same field of view  
135 (Fig. 1A).

136           In order to define the conditions for immunostaining using human serum, we selected a  
137 small panel of negative and positive control sera. Four sera from healthy donors collected before  
138 November 2019 were chosen as negative controls, and eight sera from PCR confirmed COVID-  
139 19 inpatients collected at day 14 or later post symptom onset were employed as positive controls.  
140 Sera from this test cohort were used for primary staining, and bound antibodies were detected  
141 using fluorophore-coupled secondary antibodies against human IgG, IgA or IgM.

142           No difference between infected and non-infected cells in serum IgG antibody binding was  
143 observed when sera collected before the onset of the SARS-CoV-2 pandemic were examined  
144 (Fig. 1B, Fig. S2). In contrast, COVID-19 patient sera were clearly characterized by higher serum  
145 IgG antibody binding to infected compared to non-infected cells (Fig. 1B). All eight COVID-19  
146 patient serum samples yielded higher IgG binding to infected compared to non-infected cells as  
147 assessed by visual inspection (Fig. S2). Similar results were obtained when an IgA or IgM  
148 specific secondary antibody was used for detection (Fig. S3). In order to allow for the parallel  
149 assessment of IgG and IgA or IgM antibodies, we established conditions for the parallel detection  
150 of anti-IgG coupled to AlexaFluor488 and anti-IgA or anti-IgM coupled to DyLight650 or  
151 AlexaFluor647 secondary antibodies, respectively, without signal bleedthrough. Using this  
152 approach, it was possible to implement detection of SARS-CoV-2 specific IgG and IgA or IgM  
153 antibodies in a single experimental setup (Fig. S4).

154 Titration experiments were performed with positive control sera to determine the optimal  
155 range of serum concentration in the IF experiments. All eight positive control samples showed  
156 visually detectable specific labelling of infected cells over the range of  $1:10^2$  and  $1:10^5$ ,  
157 demonstrating robustness of the assay (Fig. S5). Serum concentrations of less than  $1:10^5$  did  
158 not yield detectable signals in all cases. We decided to employ a dilution of  $1:10^2$  in the further  
159 experiments

## 160 2.2 Image analysis

161 Our next aim was to establish a semi-automated analysis workflow for image acquisition and  
162 analysis for a medium to high throughput setting. VeroE6 cells were seeded into 96-well plates  
163 infected and immunostained using anti-dsRNA antibody and patient serum, followed by indirect  
164 detection using a mixture of anti-IgG and anti-IgA/IgM secondary antibodies. Images were  
165 acquired using an automated widefield microscope (see Materials and Methods section for more  
166 detail).

167 To obtain a measure for specific antibody binding we performed automated  
168 segmentation of cells and classified them into infected and non-infected cells based on the  
169 dsRNA staining. We then measured fluorescence intensities in the serum channel per cell as a  
170 proxy for the amount of bound antibodies for both infected and non-infected cells and calculated  
171 the ratio between these values for infected and non-infected cells in a given specimen. To enable  
172 training of a machine learning approach for cell segmentation and to directly evaluate infected  
173 cell classification, we manually labelled cells and annotated them as infected/non-infected in 10  
174 images chosen from 5 positive and 5 control specimens. Fig. 2 presents a graphical overview of  
175 all analysis steps; the full description of every step can be found in Materials and Methods.  
176 Briefly, our approach works as follows:

177 First, we manually discarded all images that contained obvious artefacts such as large  
178 dust particles or dirt and out-of-focus images. Then, images were processed to correct for the  
179 uneven illumination profile in each channel. Next, we segmented individual cells with a seeded  
180 watershed algorithm <sup>[18]</sup>, using nuclei segmented via StarDist <sup>[19]</sup> as seeds and boundary  
181 predictions from a U-Net <sup>[20,21]</sup> as a heightmap. We evaluated this approach using leave-one-  
182 image-out cross-validation on the manual annotations and measured an average precision<sup>[22]</sup> of  
183  $0.77 \pm 0.08$  (i.e., on average 77% of segmented cells are matched correctly to the  
184 corresponding cell in the annotations). Combined with extensive automatic quality control which

185 discards outliers in the results, the segmentation was found to be of sufficient quality for our  
186 analysis, especially since robust intensity measurements were used to reduce the effect of  
187 remaining errors.

188 We then classified the segmented cells into infected and non-infected, by measuring  
189 the 95th percentile intensities in the dsRNA channel and classifying cells as infected if this value  
190 exceeded 4.8 times the noise level, determined by the mean absolute deviation. This factor and  
191 the percentile were determined empirically using grid search on the manually annotated images  
192 (see above). Using leave-one-out cross validation on the image level, we found that this  
193 approach yields an average F1-score of 84.3%.

194 In order to make our final measurement more reliable, we then discarded whole wells,  
195 images or individual segmented cells based on quality control criteria that were determined by  
196 inspection of initial results. Those criteria include a minimal number of non-infected cells per  
197 well; minimal and maximal number of cells per image; minimal cell intensities for images; and  
198 minimal and maximal sizes of individual cells (see Materials and Methods for full details).

199 To score each sample, we computed the intensity ratio  $r$  :

$$r = \frac{m_I}{m_N} \quad \text{Eq. 1}$$

200 Here,  $m_I$  is the median serum intensity of infected cells and  $m_N$  the median serum intensity of  
201 non-infected cells. For each cell, we compute its intensity by computing the mean pixel intensity  
202 in the serum channel (excluding the nucleus area where we typically did not observe serum  
203 binding) and then subtracting the background intensity, which is measured on two control wells  
204 that did not contain any serum.

205 We used efficient implementations for all processing steps and deployed the analysis  
206 software on a computer cluster in order to enhance the speed of imaging data processing. For  
207 visual inspection, we have further developed an open-source software tool (PlateViewer) for  
208 interactive visualization of high-throughput microscopy data <sup>[23]</sup>. PlateViewer was used in a final  
209 quality control step to visually inspect positive hits. For example, PlateViewer inspection allowed  
210 identifying a characteristic spotted pattern co-localizing with the dsRNA staining (Fig. S6) that  
211 was sometimes observed in the IgA channel upon staining with negative control serum. In  
212 contrast, sera from COVID-19 patients typically displayed cytosol, ER-like and plasma  
213 membrane staining patterns in this channel (Fig. 1B, Fig. S3). The dsRNA co-localizing pattern

214 observed for sera from the negative control cohort is by definition non-specific for SARS-CoV-2,  
215 but would be classified as a positive hit based on staining intensity alone. Using PlateViewer,  
216 we performed a quality control on all IgA positive hits and removed those displaying the spotted  
217 pattern colocalising with the dsRNA signal from further analysis.

## 218 2.3 Assay characterization and validation

219 With the immunofluorescence protocol and automated image analysis in place we  
220 proceeded to test a larger number of control samples in a high throughput compatible manner  
221 for assay validation. All samples were processed for IF as described above, and in parallel  
222 analysed by a commercially available semi-quantitative SARS-CoV-2 ELISA approved for  
223 diagnostic use (Euroimmun, Lübeck, Germany) for the presence of SARS-CoV-2 specific IgG  
224 and IgA antibodies.

225 As outlined above, a main concern regarding serological assays for SARS-CoV-2  
226 antibody detection is the occurrence of false positive results. A particular concern in this case is  
227 cross-reactivity of antibodies that originated from infection with any of the four types of common  
228 cold Corona viruses (ccCoV) circulating in the population. The highly immunogenic major  
229 structural proteins of SARS-CoV-2 nucleocapsid (N) and spike (S) protein, have an overall  
230 homology of ~30% <sup>[3]</sup> to their counterparts in ccCoV and subdomains of these proteins display a  
231 higher degree homology; cross-reactivity with ccCoV has been discussed as the major reason  
232 for false positive detection in serological tests for closely related SARS-CoV and MERS-CoV <sup>[12]</sup>.  
233 Also, acute infection with Epstein-Barr virus (EBV) or cytomegalovirus (CMV) may result in  
234 unspecific reactivity of human sera <sup>[24,25]</sup>. We therefore selected a negative control panel  
235 consisting of 218 sera collected before the fall of 2019, comprising samples from healthy donors  
236 (n=105, cohort B), patients that tested positive for ccCoV several months before the blood  
237 sample was taken (n=34, all four types of ccCoV represented; cohort A), as well as patients with  
238 diagnosed *Mycoplasma pneumoniae* (n=22; cohort Z), EBV or CMV infection (n=57, cohort E).  
239 We further selected a panel of 57 sera from 29 RT-PCR confirmed COVID-19 patients collected  
240 at different days post symptom onset as a positive sample set (cohort C, see below).

241 Sera were employed as primary antisera for IF staining using IgM, IgA or IgG specific  
242 secondary antibodies, and samples were imaged and analysed as described above. This  
243 procedure yielded a ratiometric intensity score for each serum sample. Based on the scores  
244 obtained for the negative control cohort and the patient sera, we defined the threshold separating



245 negative from positive scores for each of the antibody channels. For this, we performed ROC  
246 curve analysis <sup>[26–28]</sup> on a subset of the data (cohorts A, B, C, Z). Using this approach, it is  
247 possible to take the relative importance of sensitivity versus specificity as well as seroprevalence  
248 in the population (if known) into account for optimal threshold definition. By giving more weight  
249 to false positive or false negative results, one can adjust the threshold dependent on the context  
250 of the study. Whereas high sensitivity is of importance for e.g. monitoring seroconversion of a  
251 patient known to be infected, high specificity is crucial for population based screening  
252 approaches, where large study cohorts characterized by low seroprevalence are tested. Since  
253 we envision the use of the assay for screening approaches, we decided to assign more weight  
254 to specificity at the cost of sensitivity for our analyses (see Materials and Methods for an in-depth  
255 description of the analysis). Optimal separation in this case was given using threshold values of  
256 1.39, 1.31 and 1.27 for IgA, IgG and IgM channels respectively (Fig. S7). We validated the  
257 classification performance on negative control cohort E (n=57) which was not seen during  
258 threshold selection, and detected no positive scores. Results from the analysis of the negative  
259 control sera are presented in Fig. 4 and Table 1.

260 While the majority of these samples tested negative in ELISA measurements as well  
261 as in the IF analyses, some positive readings were obtained in each of the assays, in particular  
262 in the IgA specific analyses (Fig. 4 and Table 1). Since samples from these cohorts were  
263 collected between 2015 and 2019, and donors were therefore not exposed to SARS-CoV-2  
264 before sampling, these readings represent false positives. Of note, negative control cohort E  
265 displayed a particularly high rate of false positives in ELISA measurements, but not in IF (Table  
266 1). We conclude that the threshold values determined achieve our goal of yielding highly specific  
267 IF results (at the cost of sub-maximal sensitivity).

268 Roughly 10.6% (IgA) or 3% (IgG) of the samples were classified as positive or  
269 potentially positive by ELISA (Table 1). The notably lower specificity of the IgA determination in  
270 a seronegative cohort observed here is in accordance with findings in other studies <sup>[29,30]</sup> and  
271 information provided by the manufacturer of the test (90,5% for IgA vs. 99,3% for IgG;  
272 Euroimmun SARS-CoV-2 data sheet, April 24, 2020; in response to these findings, an improved  
273 version of the test has been recently developed). The respective proportion of false-positives  
274 obtained based on IF, 0% for IgA and 0,9% for IgG, were lower, indicating higher specificity of  
275 the IF readout compared to the ELISA measurements. Importantly, however, false positive  
276 readings did not correlate between ELISA and IF (Fig. 4). Thus, classifying only samples that  
277 test positive in both assays as true positives resulted in the elimination of false positive results

278 (0 of 218 positives detected). We conclude that applying both methods in parallel and using the  
279 'double positive' definition for classification notably improves specificity of SARS-CoV-2 antibody  
280 detection.

281 In order to determine the sensitivity of our IF assay, we employed 57 sera from 29  
282 symptomatic COVID-19 patients that had been RT-PCR confirmed for SARS-CoV-2 infection.  
283 Archived sera from these patients had been collected in the range between day 5 and 27 post  
284 symptom onset. Again, samples were measured both in IF and ELISA, and the correlation  
285 between the semi-quantitative values was assessed as shown in Fig. 5. While there were  
286 deviations in the height of the values, positive correlation was evident in both cases, with values  
287 for the IgG readout being more congruent than those for the less specific IgA determination  
288 (Pearson  $r$ : 0,847 for IgG; 0,655 for IgA).

289 For an assessment of sensitivity, we stratified the samples according to the day post  
290 symptom onset, as shown in Fig. 6. and Table 2. For both methods, and for all antibody classes,  
291 mean values and the proportion of positive samples increased over time. In all cases, only  
292 positive values were obtained for samples collected later than day 14 post symptom onset, in  
293 accordance with other reports <sup>[30–32]</sup>. Consistent with other reports <sup>[32]</sup>, SARS-CoV-2 specific IgM  
294 was not detected notably earlier than the two other antibody classes in our measurements. At  
295 the earlier time points (up to day 14), a similar or higher proportion of positive samples was  
296 detected by IF compared to ELISA for IgG. Although the sample size used here is too small to  
297 allow a firm conclusion, these results suggest that the sensitivity of IgG detection by the semi-  
298 quantitative IF approach is higher than that of an approved semi-quantitative ELISA assay  
299 routinely used in diagnostic labs. In the case of IgA detection at earlier time points (< day 11)  
300 ELISA performed slightly better (11/17 samples scored positive) compared to IF (9/17 scored  
301 positive) however that came with the price of a very low specificity of ELISA IgA assay (10.6%  
302 false negative detection) compared to IF (0.5%).

### 303 3. Discussion

304

305

306

307

308

309

310

311

312

313

314

315

316

317

318

319

320

321

322

323

324

325

326

327

328

329

330

331

332

333

334

335

Here, we describe the development of a semi-quantitative IF based assay for detection of SARS-CoV-2 specific antibodies in human samples that complements available ELISA-based testing systems <sup>[33,34]</sup>. Alternatives to ELISA-based commercial test kits are important in situations where those kits are not available either because they are not yet developed in early days of the pandemic or due to high global demands for tests and required reagents. The microscopy-based assay described here has been developed during the early phase of the COVID-19 pandemic to support the serological testing needs of the University Hospital Heidelberg, Germany and is employed as a confirmatory assay in clinical studies <sup>[35]</sup> and ongoing studies]. The assay displayed comparable or slightly better sensitivity and specificity than a commercially available semi-quantitative SARS-CoV-2 ELISA approved for diagnostic use at the time. More importantly, combining two technically different serological assays, IF and ELISA, and classifying as “positive hits” only those that scored positive in both assays was instrumental to minimize false positive results while maintaining high sensitivity, and thus serves as a principle for serological studies or diagnostics where specificity of detection is of critical importance. Specificity of detection is essential in settings of relatively low SARS-CoV-2 antibody prevalence <sup>[36–38]</sup> in conjunction with high prevalence of potentially cross-reactive anti-ccCoV antibodies in a global population <sup>[39]</sup>.

One advantage of the IF based assay presented here is that the specimens used for detection present the entire viral proteome, while ELISA or chemiluminescent approaches use a single recombinantly expressed antigen. Both the N and S protein of coronaviruses are highly immunogenic, and antibodies binding to the receptor binding domain on the S1 subunit are considered most relevant for neutralization. However, the relative importance of antibodies directed against the N protein for potential protective immunity against SARS-CoV-2 and the possible relevance of the overall breadth of the antibody response is currently unclear. Other SARS-CoV-2 structural and non-structural proteins might play a role in immune response as it was shown for proteins 3a and 9b of the closely related SARS-CoV <sup>[40]</sup>. In addition, expression of the viral proteome in permissive cells ensures correct protein folding and post-translational modification patterns. Alterations in post-translational modifications are likely to influence the ability of serum antibodies to bind to different viral epitopes as it was shown for other viruses such as HIV-1 <sup>[41]</sup>. It has to be noted that the detection of viral RNA requires fixation and permeabilization of cells, which has the potential to affect epitope preservation. However, based

336 on the high sensitivity of antibody detection and the good correlation to ELISA measurements  
337 observed we conclude that this was no major concern in this case.

338 Two major disadvantages of typical IF-based serological assays as applied in the past  
339 are manual microscopy acquisition steps and evaluation of samples based on a visual  
340 inspection. This procedure is incompatible with high throughput approaches and results are  
341 subjective, not quantitative and difficult to standardize. We have addressed these disadvantages  
342 by implementing automated microscopy acquisition and developing a robust software platform  
343 that is able to identify individual cells, classify infected and non-infected cells and take into  
344 account specific and non-specific background in order to generate semi-quantitative results.  
345 Depending on the context of a study and the questions to be addressed, sensitivity or specificity  
346 may be of higher importance. The automated image analysis protocol developed here allows the  
347 user to adapt the classification according to the study needs, putting more weight on either one  
348 of the parameters.

349 Automated image acquisition and image analysis presented here are compatible with a  
350 high throughput approach. Plates with fixed samples of infected cells can be prepared in  
351 advance and stored at 4°C for several weeks. In the manual workflow used here, four 96-well  
352 plates (384 samples) could easily be analysed within a typical work day (1.5 h for  
353 immunofluorescence, 1.5 h for image acquisition, 2 h of image analysis). This is already the  
354 throughput in the range of some ELISA-based automated systems used in diagnostics and is  
355 sufficient for urgent applications in an early phase of disease response. The major disadvantage  
356 of the procedure described here for a virus like SARS-CoV-2 is the requirement of a BSL3  
357 containment area to generate virus stocks and produce infected cell specimens. Recombinant  
358 cell lines expressing key viral antigens can address this drawback and also allows to easily  
359 implement already established automated cell seeding and immunostaining pipelines for a true  
360 high-throughput application <sup>[42,43]</sup>. Combining such cell lines with spectral unmixing microscopy  
361 <sup>[44]</sup> would not only enable simultaneous determination of levels of all three major classes of  
362 antibodies (IgM, IgG and IgA), but also identification of the viral antigens recognized, in a single  
363 multiplexed approach. The high information content of the IF data (differential staining patterns)  
364 together with a machine learning-based approach <sup>[45]</sup> and the implementation of stable cell lines  
365 expressing selected viral antigens in the IF assay will provide additional parameters for  
366 classification of patient sera and further improve sensitivity and specificity of the presented IF  
367 assay.

368 The described analysis pipeline can be readily applied for serological analysis of other  
369 virus infections, provided that an infectable cell line and a staining procedure that allows

370 differentiating between infected and non-infected cells are available. The assay described here  
371 thus offers potential as an immediate response to any future virus pandemic, as it can be rapidly  
372 deployed from the moment the first isolate of the pathogen has been obtained without requiring  
373 information on the expression of immunogenicity of viral proteins.

374

## 375 4. Materials and Methods

### 376 4.1 Human material

377 Negative control serum samples (n=218) were collected for various serological testing in the  
378 routine laboratory of the Center of Infectious Diseases, University Hospital Heidelberg between  
379 2015 and 2019, before the start of the SARS-CoV-2 outbreak. Samples used corresponded to  
380 pseudonymized remaining material from the archive of the Center of Infectious Diseases  
381 Heidelberg. SARS-CoV-2 positive sera were collected from 29 PCR confirmed symptomatic  
382 COVID-19 inpatients (n=17) or outpatients (n=12) treated at the University Hospital Heidelberg  
383 under general informed consent (ethics votum no S-148/2020, University Hospital Heidelberg).  
384 Days post symptom onset were defined based on the anamnesis carried out upon admission.  
385 Serum samples were stored at -20°C until use.

### 386 4.2 Virus stock production

387 VeroE6 cells were cultured in Dulbecco's modified Eagle medium (DMEM, Life Technologies)  
388 containing 10% fetal bovine serum, 100 U/mL penicillin, 100 µg/mL streptomycin and 1% non-  
389 essential amino acids (complete medium).

390 SARS-CoV-2 virus stocks were produced by amplification of the BavPat1/2020 strain (European  
391 Virus Archive) in VeroE6 cells. To generate the seed virus (passage 3), VeroE6 cells were  
392 infected with the original virus isolate, received as passage 2, at an MOI of 0.01. At 48 h post  
393 infection (p.i.), the supernatant was harvested and cell debris was removed by centrifugation at  
394 800xg for 10 min. For production of virus stocks (passage 4), 500µl of the seed virus was used  
395 to infect  $9 \times 10^6$  VeroE6 cells. The resulting supernatant was harvested 48h later as described  
396 above. Virus titers were determined by plaque assay. Briefly,  $2.5 \times 10^6$  VeroE6 cells were plated  
397 into 24 well plates. 24 h later, cells were infected with serial dilutions of SARS-CoV-2 for 1 h.  
398 Inoculum was then removed and the cells were overlaid with serum free DMEM containing 0.8%

399 carboxymethylcellulose. At 72 h. p.i., cells were fixed with 5% formaldehyde for 1 h followed by  
400 staining with 1% Crystal violet solution. Plaque forming units per ml (PFU/ml) were estimated by  
401 manual counting of the viral plaques. Stock solutions were stored in aliquots at -80°C until use  
402 for infection experiments.

#### 403 *4.3 Infection of cells and immunofluorescence staining*

404 In order to find a suitable cell line for our application, we performed pre-experiments comparing  
405 different cell lines with respect to their susceptibility to SARS-CoV-2 infection. Cells were seeded  
406 on glass coverslips and infected on the following day with SARS-CoV-2 strain BavPat1/2020 for  
407 16h at MOI 0.01. Cells were fixed with 6%PFA in PBS, followed by permeabilisation with 0.5%  
408 Triton X100 in PBS and then subjected to a standard immunofluorescence staining protocol as  
409 described in materials and methods. Only very few infected cells were detected in the case of  
410 hepatocyte-derived carcinoma cells (HUH-7), human embryonic kidney (HEK293T) and human  
411 alveolar basal epithelial (A549) cells (Fig. S1). Calu-3 cells grew in small clumps, often on top of  
412 each other which impacted our microscopy-based readout. In contrast, VeroE6 cells grew as a  
413 monolayer and were viable for at least 24 h p.i. Based on these results, VeroE6 cells were  
414 chosen for all experiments in this manuscript.

415 For serum screening by IF microscopy, VeroE6 cells were seeded at a density of 7,000 cells per  
416 well into a black-wall glass-bottom 96 well plates (Corning, Product Number 353219) or on glass  
417 coverslips placed in a 24-well plate. 24 h after seeding, cells were infected with SARS-CoV-2 at  
418 an MOI of 0.01 for 16 h. Cells were then fixed with 6% Formaldehyde for 1 h followed by washing  
419 3x with phosphate buffered saline (PBS) under biosafety level 3. Afterwards, samples were  
420 handled under biosafety level 2. Cells were washed once in PBS containing 0,02% Tween 20  
421 (Sigma) and permeabilised using 0,5% Triton X100 (Sigma) for 10 minutes. Samples were  
422 washed again and blocked using 2% powdered milk (Roth) in PBS for 20 min followed by two  
423 additional washing steps. All washing steps in a 96-well format were performed using the  
424 HydroFlex microplate washer (Tecan). Next, cells were incubated with patient serum (prediluted  
425 1:1 in 0,4% Triton-X100 in PBS; further dilution 1:50 in PBS if not stated otherwise) and anti-ds-  
426 RNA mouse monoclonal J2 antibody (Scicons, 1:4000) in PBS for 30 min at room temperature.  
427 After 3 washing steps, cognate secondary antibodies were applied for 20 min at room  
428 temperature. Goat anti-human IgG-AlexaFluor 488 (Invitrogen, Thermofisher Scientific), goat  
429 anti-human IgA DyLight 650 (Abcam), goat anti-human IgM u chain (Invitrogen, Thermofisher  
430 Scientific), for detecting immunoglobulins in human serum together with goat anti-mouse IgG-

431 AlexaFluor 568 (Invitrogen, Thermofisher Scientific) for dsRNA detection, all at 1:2000 dilution  
432 in PBS, have been used. After incubation with secondary antibodies cells were washed twice,  
433 stained with Hoechst (0,002 $\mu$ g/ml in PBS) for 3 minutes, washed again twice and stored at +4°C  
434 until imaging.

#### 435 *4.4 Microscopy*

436 Samples were imaged on motorized Nikon Ti2 widefield microscope using a Plan Apo lambda  
437 20x/0.75 air objective and a back-illuminated EM-CCD camera (Andor iXon DU-888). To  
438 automatically acquire images in 96-well format, the JOBS module was used. The system was  
439 configured to acquire 9 images per well (in a regular 3 x 3 pattern centered in the middle of each  
440 well). The Perfect Focus System was used for autofocusing followed by a software-based fine  
441 focusing using the Hoechst signal in an axial range of 40 $\mu$ m. Images were acquired in 4 channels  
442 using the following excitation/emission settings: Ex 377/50, Em 447/60 (Hoechst); Ex 482/35,  
443 Em 536/40 (AlexaFluor 488); Ex 562/40, Em 624/40 (AlexaFluor 568) and Ex 628/40, Em 692/40  
444 (AlexaFluor 647 and DyLight 650). Exposure times were in the range between 50 and 100ms  
445 with EM gain between 50 and 150.

446

#### 447 *4.5 Enzyme linked immuno- sorbent assay (ELISA)*

448 ELISA measurements for determination of reactivity against the S1 domain of the viral spike  
449 protein were carried out using the Euroimmun Anti-SARS-CoV-2-ELISA (IgA) and Anti-SARS-  
450 CoV-2-ELISA (IgG) test kits (Euroimmun, Lübeck, Germany; EI 2606-9601 A and EI 2606-9601  
451 G) run on an Euroimmun Analyzer I instrument according to the manufacturer's instructions.  
452 Optical densities measured for the samples were normalized using the value obtained for a  
453 calibrator sample provided in the test kit. The interpretation of the semi-quantitative ratiometric  
454 values obtained followed the manufacturer's protocol: values <0.8 were classified as negative,  
455 0.8-1.1 as borderline, and values of 1.1 or higher as positive.

#### 456 *4.6 Image Analysis*

##### 457 *Manual Annotations*

458 Two of our processing steps require manually annotated data: in order to train the convolutional  
459 neural network used for boundary and foreground prediction, we needed label masks for the  
460 individual cells. To determine suitable parameters for the infected cell classification, we needed  
461 a set of cells classified as being infected or non-infected. We have produced these annotations

462 for 10 images with the following steps. First, we created an initial segmentation following the  
463 approach outlined in the Segmentation subsection, using boundary and foreground predictions  
464 from the ilastik <sup>[46]</sup> pixel classification workflow, which can be obtained from a few sparse  
465 annotations. We then corrected this segmentation using the annotation tool BigCat  
466 (<https://github.com/saalfeldlab/bigcat>). After correction, we manually annotated these cells as  
467 infected or non-infected. Note that this mode of annotations can introduce two types of bias: the  
468 segmentation labels are derived from an initial segmentation. Small systematic errors in the  
469 initial segmentation that were not found during correction, could influence the boundary  
470 prediction network. More importantly, when annotating the infected / non-infected cells, both the  
471 serum channel and the virus marker channel have to be available to the annotators, in order to  
472 visually delineate the cells. This may result in subconscious bias, with the observed intensity in  
473 the serum channel influencing the decision on the infection status of a cell.

474

#### 475 *Preprocessing*

476 On all acquired images, we performed minimal preprocessing (i.e., flat-field correction) in order  
477 compensate for uneven illumination of the microscope system <sup>[47]</sup>. First, we subtract a constant  
478 CCD camera offset (`ccd_offset`). Secondly, we correct uneven illumination by dividing each  
479 channel by a corresponding corrector image (`flatfield(x, y)`), which was obtained as a normalized  
480 average of all images of that channel, smoothed by a normalized convolution with a Gaussian  
481 filter with a bandwidth of 30 pixels.

$$\text{processed}(x, y) = \frac{\text{raw}(x, y) - \text{ccd\_offset}}{\text{flatfield}(x, y) - \text{ccd\_offset}} \quad \text{Eq. 2}$$

482 This corrector image was obtained for all images of a given microscope set-up. Full background  
483 subtraction is performed later in the pipeline using either the background measured on wells that  
484 (deliberately) do not contain any serum or, if not available, using a fixed value that was  
485 determined manually.

486

#### 487 *Segmentation*

488 Cell segmentation forms the basis of our analysis method. In order to obtain an accurate  
489 segmentation, we make use of both the DAPI and the serum channel. First, we segment the  
490 nuclei on the DAPI channel using the StarDist method <sup>[19]</sup> trained on data from Caicedo et al.  
491 2019 <sup>[48]</sup>. Note that this method yields an *instance segmentation*: each nucleus in the image is  
492 assigned a unique ID. In addition, we predict per pixel probabilities for the boundaries between



493 cells and for the foreground (i.e. whether a given pixel is part of a cell) using a 2D U-Net <sup>[20]</sup>  
494 based on the implementation of Wolny et al. 2020 <sup>[21]</sup>. This method was trained using the 9  
495 annotated images, see above. The cells are then segmented by the seeded watershed algorithm  
496 <sup>[18]</sup>. We use the nucleus segmentation, dilated by 3 pixels, as seeds and the boundary predictions  
497 as the height map. In addition, we threshold the foreground predictions, erode the resulting  
498 binary image by 20 pixels and intersect it with the binarised seeds. The result is used as a  
499 foreground mask for the watershed. The dilation / erosion is performed to alleviate issues with  
500 very small nucleus segments / imprecise foreground predictions. In order to evaluate this  
501 segmentation method, we train 9 different networks using leave-one-out cross-validation,  
502 training each network on 8 of the manually annotated images and evaluating it on the remaining  
503 one. We measure the segmentation quality using average precision <sup>[22]</sup> at an intersection over  
504 union (IoU) threshold of 0.5 as described in [https://www.kaggle.com/c/data-science-bowl-](https://www.kaggle.com/c/data-science-bowl-2018/overview/evaluation)  
505 [2018/overview/evaluation](https://www.kaggle.com/c/data-science-bowl-2018/overview/evaluation). We measure a value of 0.77 +- 0.08 with the optimum value being  
506 1.0.

507

## 508 *Quantitation and Scoring*

### 509 *Infection classification*

510 To distinguish infected cells from control cells we use the dsRNA virus marker channel: infected  
511 cells show a signal in this channel while the non-infected control cells should ideally be invisible  
512 (see Fig. 3). We classified each cell in the cell segmentation (see above) individually, using the  
513 following procedure. First, we denoised the marker channel using a white tophat filter with a  
514 radius of 20 pixels. To account for inaccuracies in the cell segmentation (the exact position of  
515 cell borders is not always clear), we then eroded all cell masks with a radius of 5 pixels and  
516 thereby discard pixels close to segment boundaries. This step does not lead to information loss,  
517 since the virus marker is mostly concentrated around the nuclei. On the remaining pixels of each  
518 cell, we compute the 0.95 quantile ( $q$ ) of the intensity in the marker channel. For the pixels that  
519 the neural network predicts to belong to the background ( $b$ ), we compute the median intensity  
520 of the virus marker channel across all images in the current plate. Finally, we classify the cell as  
521 infected if the 0.95 quantile of its intensity exceeds the median background by more than a given  
522 threshold:

$$q - \text{median}(b) > t$$

Eq. 3

523 For additional robustness against intensity variations we adapt the threshold based on the  
524 variation in the background in the plate. Hence, we define it as a multiple of the mean absolute  
525 deviation of all background pixels of that plate with  $N=4.8$ :

$$t = N \cdot \text{mad}(b) \quad \text{Eq. 4}$$

526 To determine the optimal values of the parameters used in our procedure, we used the cells  
527 manually annotated as infected / non-infected (see above). We performed grid search over the  
528 following parameter ranges:

- 529 ● Quantile: 0.9, 0.93, 0.95, 0.96, 0.97, 0.98, 0.99, 0.995
- 530 ●  $N$ : 0 to 10 in intervals of 0.1

531 To estimate the validation accuracy, we performed leave-one-out cross-validation on the image  
532 level. This yields an average validation F1 score of 84.3%, precision of 84.3% and recall of  
533 84.8%. These values are the arithmetic means of the individual results per split.

534

#### 535 *Immunoglobulin intensity measurements*

536

537 In order to obtain a relative measure of antibody binding, we determined the mean intensity and  
538 the integrated intensity in each segmented cell from images recorded in the IgG, IgA or IgM  
539 channel. A comparative analysis revealed that the mean intensity was more robust against the  
540 variability of cell sizes, whereas using the integrated intensity as a proxy yielded a higher  
541 variance in non-infected cells. Thus, mean intensity per cell was chosen as a proxy for the  
542 amount of antibody bound. Non-specific auto-fluorescence signals required a background  
543 correction of the measured average serum channel intensities. For background normalization,  
544 we used cells (one well per plate) which were not immunostained with primary antiserum. From  
545 this we computed the background to be the median serum intensity of all pixels of images taken  
546 from this well. This value was subtracted from all images recorded from the respective plate. In  
547 case this control well was not available, background was subtracted manually by selecting the  
548 area outside of cells in randomly selected wells and measuring the median intensity.

549

#### 550 *Scoring*

551 The core interest of the assay is to measure the difference of antibody binding to cells infected  
552 with the coronavirus in comparison to non-infected control cells. To this end, utilizing the results  
553 of the image analysis, we compute the following summary statistics of the background corrected  
554 antibody binding of infected cells,  $I$ , and of non-infected cells,  $N$ :

$$m_I = \text{median}(I) \quad \text{Eq. 5}$$

$$m_N = \text{median}(N) \quad \text{Eq. 6}$$

$$\sigma_N = \text{mad}(N) \quad \text{Eq. 7}$$

Using these, the ratio  $r$ , difference  $d$  and robust z score  $z$  are computed:  $r = \frac{m_I}{m_N}$  Eq. 8

$$d = m_I - m_N \quad \text{Eq. 9}$$

$$z = \frac{m_I - m_N}{\sigma_N} \quad \text{Eq. 10}$$

555 We compute above scores for each well and each image, taking into account only the cells that  
556 passed all quality control criteria (see below). While the final readout of the assay is well-based,  
557 image scores are useful for quality control.

558

#### 559 *Decision threshold selection*

560 In order to determine the presence of SARS-CoV-2 specific antibodies in patient sera, it was  
561 necessary to define a decision threshold  $r^*$ . If a measured intensity ratio  $r$  is above a decision  
562 threshold  $r^*$  than the serum would be characterized as positive for SARS-CoV-2 antibodies. For  
563 this an ROC analysis was performed [28]. Each possible choice of  $r^*$  for a test corresponds to a  
564 particular sensitivity/specificity pair. By continuously varying the decision threshold, we  
565 measured all possible sensitivity/specificity pairs, known as ROC curves (Fig. S7). To determine  
566 the appropriate  $r^*$  we considered two factors [26]:

567

568 • The undesirability of errors or relative cost of false-positive and false-negative  
569 classifications

570 • The prevalence, or prior probability of disease

571

572 These factors can be combined to calculate a slope in the ROC plot<sup>[26-28]</sup>

$$m = \frac{(\text{falsepositivecost}) (1 - P)}{(\text{falsenegativcost}) P} \quad \text{Eq. 11}$$

573 where  $P$  is the prevalence or prior probability of disease.

574

575 The optimal decision threshold  $r^*$ , given the false-positive/false-negative cost ratio and  
576 prevalence, is the point on the ROC curve where a line with slope  $m$  touches the curve. As

577 discussed in the main text, a major concern regarding serological assays for SARS-CoV-2  
578 antibody detection is the occurrence of false-positive results. Therefore, we choose  $m$  to be  
579 larger than one in our analysis. In particular, we determine  $r^*$  for the choice of  $m=10$  (see Fig.  
580 S7).

### 581 *Quality control*

582 We performed quality control of the images and analysis results at the level of wells, images and  
583 cells. The entities that did not pass quality control are not taken into account when computing  
584 the score during final analysis. We exclude wells that contain less than 100 non-infected cells,  
585 that have a median serum intensity of infected cells smaller than 3 times the noise level  
586 (measured by the median absolute deviation), or that have negative intensity ratios, which can  
587 happen due to the background subtraction. Out of 1.736 wells, 94 did not pass the quality control,  
588 corresponding to 5.4 % of wells. At the image level, we visually inspect all images and mark  
589 those that contain imaging artifacts using a viewer based on napari <sup>[49]</sup>. We distinguish the  
590 following types of artifacts during the visual inspection: empty, unstained or over-saturated  
591 images, as well as images covered by a large bright object. In addition, we automatically exclude  
592 images that contain less than 10 or more than 1000 cells. These thresholds are motivated by  
593 the observation that too few or too many cells often result from a problem in the assay. Thus,  
594 296 of the total 15.624 images were excluded from further analysis, corresponding to 1.9 % of  
595 images. Out of these, 295 were manually marked as outliers and only a single one did not pass  
596 the subsequent automatic quality control. Finally, we automatically exclude segmented cells with  
597 a size smaller than 250 pixels or larger than 12.500 pixels that most likely correspond to  
598 segmentation errors. These limits were derived by the histogram of cell sizes investigated for  
599 several plates. Two percent of the approximate 5.5 million segmented cells did not pass this  
600 quality control. In addition, we have also inspected all samples scored as positives. For the IgA  
601 channel, we have found a dotted staining pattern in ten cases that produced positive hits based  
602 on intensity ratio in negative control cohorts, but does not appear to indicate a specific antibody  
603 response. We have also excluded these samples from further analysis.

### 604 *Implementation*

605 In order to scale the analysis workflow to the large number of images produced by the assay,  
606 we implemented an open-source python library to run the individual analysis steps. This library  
607 allows rerunning experiments for a given plate for newly added data on demand and caches  
608 intermediate results in order to rerun the analysis from checkpoints in case of errors in one of

609 the processing steps. To this end, we use a file layout based on hdf5 <sup>[50]</sup> to store multi-resolution  
610 image data and tabular data. The processing steps are parallelized over the images of a plate if  
611 possible. We use efficient implementations for the U-Net <sup>[21]</sup>, StarDist <sup>[19]</sup> and the watershed  
612 algorithm (<http://ukoethe.github.io/vigra/>) as well as other image processing algorithms <sup>[51]</sup>. We  
613 use pytorch (<https://pytorch.org/>) to implement GPU-accelerated cell feature extraction. The  
614 total processing time for a plate (containing around 800 images) is about two hours and thirty  
615 minutes using a single GPU and 8 CPU cores. In addition, the results of the analysis as well as  
616 meta-data associated with individual plates are automatically saved in a centralized MongoDB  
617 database (<https://www.mongodb.com>) at the end of the workflow execution. Apart from keeping  
618 track of the analysis outcome and meta-data, a user can save additional information about a  
619 given plate/well/image in the database conveniently using the PlateViewer (see below). All  
620 source code is available open source under the permissive MIT license at [https://github.com/hci-](https://github.com/hci-unihd/batchlib)  
621 [unihd/batchlib](https://github.com/hci-unihd/batchlib).

622

### 623 *Data visualization*

624 In order to explore the numerical results of our analysis together with the underlying image data  
625 we further developed a Fiji <sup>[52]</sup> based open-source software tool for interactive visualization of  
626 high-throughput microscopy data <sup>[23]</sup>. The PlateViewer links interactive results tables and  
627 configurable scatter plots (image and well based) with a plate view of all raw, processed and  
628 segmentation images. The PlateViewer is connected to the centralised database such that also  
629 image and well based metadata can be accessed. The viewer thus enables efficient visual  
630 inspection and scientific exploration of all relevant data of the presented assay.

631

### 632 *Data availability*

633 The data from the IF assay are available in the BioImage Archive  
634 (<http://www.ebi.ac.uk/bioimage-archive>) under accession number S-BIAD24. This includes raw  
635 microscopy images, intermediate segmentation and infected cell classification results as well as  
636 quality control and final score results.

## 637 Acknowledgements

638 We would like to thank Martin Weigert and Uwe Schmidt for their help with setting up prediction  
639 for StarDist. We would like to acknowledge Infectious Disease Imaging Platform (IDIP) at Center  
640 for Integrative Infectious Diseases Research (CIID) for microscopy support. We would like to

641 thank EMBL, especially the EMBL IT Services Department for providing computational  
642 infrastructure and support, as well as Wolfgang Huber for discussions on computing image  
643 based scores and statistical tests. We thank the patients who participated in this study. We also  
644 thank Christian Drosten at the Charité, Berlin and the European Virus Archive (EVAg) for the  
645 provision of the SARS-CoV-2 strain BavPat1. Individual images used in the Fig. 1A courtesy of  
646 medical illustrations database—<https://smart.servier.com/>. This work was in part supported by  
647 the Deutsche Forschungsgemeinschaft (DFG, German Research Foundation) – Projektnummer  
648 240245660 – SFB 1129 project 5 (HGK), project 6 (BM), project 11 (RB), project 14 (SB), project  
649 18 (MG) and project Z4 (FH) and by the Deutsches Zentrum fuer Infektionsforschung (VL: project  
650 TTU 04.705; RB: project TTU 05.705). SB is supported by the Heisenberg program (project  
651 number 415089553) and MLS is supported by the DFG (project number 41607209). The funders  
652 had no role in study design, data collection, interpretation, or the decision to submit the work for  
653 publication.

654

655

## 656 Conflict of Interest

657 The authors declare they have no conflicts of interest.

658

## 659 Author Contributions

660 Model system development: M. Cortese, B. Lucic, B. Cerikan, C.J. Neufeldt, M. Lusic, S.  
661 Boulant, M. Stanifer, R. Bartenschlager

662 Microscopy development: S. Olberg, V. Laketa

663 Image analysis development: C. Pape, R. Remme, A. Wolny, S. Wolf, L. Cerrone, S. Klaus, M.  
664 Ganter, F.A.Hamprecht, A. Kreshuk, C. Tischer, V. Laketa

665 ELISA assay: S. Wolf, P. Schnitzler

666 Sera selection and processing: S. Ullrich, M. Anders-Össwein, B. Müller, P. Schnitzler, U. Merle

667 Data interpretation: C. Pape, R. Remme, A. Wolny, S. Wolf, F. A. Hamprecht, A. Kreshuk, C.  
668 Tischer, H-G. Kräusslich, B. Müller, V. Laketa

669 Study design: F. A. Hamprecht, H-G. Kräusslich, B. Müller, V. Laketa

670 Manuscript writing, figures, tables: C. Pape, R. Remme, A. Wolny, S. Wolf, L. Cerrone, F. A.  
671 Hamprecht, A. Kreshuk, C. Tischer, B. Müller, V. Laketa

672 All authors have read and approved the final version of the manuscript.

## 673 References

- 674 [1] F. Wu, S. Zhao, B. Yu, Y.-M. Chen, W. Wang, Z.-G. Song, Y. Hu, Z.-W. Tao, J.-H. Tian,  
675 Y.-Y. Pei, M.-L. Yuan, Y.-L. Zhang, F.-H. Dai, Y. Liu, Q.-M. Wang, J.-J. Zheng, L. Xu, E.  
676 C. Holmes, Y.-Z. Zhang, *Nature* **2020**, *579*, 265.
- 677 [2] A. E. Gorbalenya, S. C. Baker, R. S. Baric, R. J. de Groot, C. Drosten, A. A. Gulyaeva,  
678 B. L. Haagmans, C. Lauber, A. M. Leontovich, B. W. Neuman, D. Penzar, S. Perlman, L.  
679 L. M. Poon, D. V. Samborskiy, I. A. Sidorov, I. Sola, J. Ziebuhr, *Nat. Microbiol.* **2020**, *5*,  
680 536.
- 681 [3] P. Zhou, X.-L. Yang, X.-G. Wang, B. Hu, L. Zhang, W. Zhang, H.-R. Si, Y. Zhu, B. Li, C.-  
682 L. Huang, H.-D. Chen, J. Chen, Y. Luo, H. Guo, R.-D. Jiang, M.-Q. Liu, Y. Chen, X.-R.  
683 Shen, X. Wang, X.-S. Zheng, K. Zhao, Q.-J. Chen, F. Deng, L.-L. Liu, B. Yan, F.-X.  
684 Zhan, Y.-Y. Wang, G.-F. Xiao, Z.-L. Shi, *Nature* **2020**, *579*, 270.
- 685 [4] V. M. Corman, O. Landt, M. Kaiser, R. Molenkamp, A. Meijer, D. K. Chu, T. Bleicker, S.  
686 Brünink, J. Schneider, M. L. Schmidt, D. G. Mulders, B. L. Haagmans, B. van der Veer,  
687 S. van den Brink, L. Wijsman, G. Goderski, J.-L. Romette, J. Ellis, M. Zambon, M. Peiris,  
688 H. Goossens, C. Reusken, M. P. Koopmans, C. Drosten, *Eurosurveillance* **2020**, *25*, 1.
- 689 [5] V. L. Dao Thi, K. Herbst, K. Boerner, M. Meurer, L. P. Kremer, D. Kirrmaier, A.  
690 Freistaedter, D. Papagiannidis, C. Galmozzi, M. L. Stanifer, S. Boulant, S. Klein, P.  
691 Chlanda, D. Khalid, I. Barreto Miranda, P. Schnitzler, H.-G. Kräusslich, M. Knop, S.  
692 Anders, *Sci. Transl. Med.* **2020**, *12*, eabc7075.
- 693 [6] M. Venter, K. Richter, *J. Clin. Pathol.* **2020**, *73*, 370.
- 694 [7] S. Hsiang, D. Allen, S. Annan-Phan, K. Bell, I. Bolliger, T. Chong, H. Druckenmiller, L.  
695 Y. Huang, A. Hultgren, E. Krasovich, P. Lau, J. Lee, E. Rolf, J. Tseng, T. Wu, *Nature*  
696 **2020**, 1.
- 697 [8] E. Callaway, H. Ledford, S. Mallapaty, *Nature* **2020**, *583*, 178.
- 698 [9] K. Mizumoto, K. Kagaya, A. Zarebski, G. Chowell, *Eurosurveillance* **2020**, *25*, 2000180.
- 699 [10] H. Qiu, J. Wu, L. Hong, Y. Luo, Q. Song, D. Chen, *Lancet Infect. Dis.* **2020**, *20*, 689.
- 700 [11] J. S. Weitz, S. J. Beckett, A. R. Coenen, D. Demory, M. Dominguez-Mirazo, J. Dushoff,  
701 C. Y. Leung, G. Li, A. Măgălie, S. W. Park, R. Rodriguez-Gonzalez, S. Shivam, C. Y.  
702 Zhao, *Nat. Med.* **2020**, 1.
- 703 [12] B. Meyer, C. Drosten, M. A. Müller, *Virus Res.* **2014**, *194*, 175.
- 704 [13] J. D. Whitman, J. Hiatt, C. T. Mowery, B. R. Shy, R. Yu, T. N. Yamamoto, U. Rathore,  
705 G. M. Goldgof, C. Whitty, J. M. Woo, A. E. Gallman, T. E. Miller, A. G. Levine, D. N.  
706 Nguyen, S. P. Bapat, J. Balcerak, S. A. Bylsma, A. M. Lyons, S. Li, A. W. Wong, E. M.  
707 Gillis-Buck, Z. B. Steinhart, Y. Lee, R. Apathy, M. J. Lipke, J. A. Smith, T. Zheng, I. C.  
708 Boothby, E. Isaza, J. Chan, D. D. Acenas, J. Lee, T. A. Macrae, T. S. Kyaw, D. Wu, D.  
709 L. Ng, W. Gu, V. A. York, H. A. Eskandarian, P. C. Callaway, L. Warriar, M. E. Moreno,  
710 J. Levan, L. Torres, L. A. Farrington, R. P. Loudermilk, K. Koshal, K. C. Zorn, W. F.

- 711 Garcia-Beltran, D. Yang, M. G. Astudillo, B. E. Bernstein, J. A. Gelfand, E. T. Ryan, R.  
712 C. Charles, A. J. Iafrate, J. K. Lennerz, S. Miller, C. Y. Chiu, S. L. Stramer, M. R. Wilson,  
713 A. Manglik, C. J. Ye, N. J. Krogan, M. S. Anderson, J. G. Cyster, J. D. Ernst, A. H. B.  
714 Wu, K. L. Lynch, C. Bern, P. D. Hsu, A. Marson, *Nat. Biotechnol.* **2020**, DOI  
715 10.1038/s41587-020-0659-0.
- 716 [14] P. K. S. Chan, K. C. Ng, R. C. W. Chan, R. K. Y. Lam, V. C. Y. Chow, M. Hui, A. Wu, N.  
717 Lee, F. H. Y. Yap, F. W. T. Cheng, J. J. Y. Sung, J. S. Tam, *Emerg. Infect. Dis.* **2004**,  
718 *10*, 530.
- 719 [15] I. J. Liu, P. J. Chen, S. H. Yeh, Y. P. Chiang, L. M. Huang, M. F. Chang, S. Y. Chen, P.  
720 C. Yang, S. C. Chang, W. K. Wang, *J. Clin. Microbiol.* **2005**, *43*, 2444.
- 721 [16] I. Manopo, L. Lu, Q. He, L. L. Chee, S. W. Chan, J. Kwang, *J. Immunol. Methods* **2005**,  
722 *296*, 37.
- 723 [17] N. S. Ogando, T. J. Dalebout, J. C. Zevenhoven-Dobbe, R. W. A. L. Limpens, Y. van der  
724 Meer, L. Caly, J. Druce, J. J. C. de Vries, M. Kikkert, M. Bárcena, I. Sidorov, E. J.  
725 Snijder, *J. Gen. Virol.* **2020**, DOI 10.1099/jgv.0.001453.
- 726 [18] J. B. T. M. Roerdink, A. Meijster, *Fundam. Informaticae* **2000**, *41*, 187.
- 727 [19] U. Schmidt, M. Weigert, C. Broaddus, G. Myers, in *Med. Image Comput. Comput.*  
728 *Assist. Interv. – MICCAI 2018. MICCAI 2018. Lect. Notes Comput. Sci.*, Springer Verlag,  
729 **2018**, pp. 265–273.
- 730 [20] O. Ronneberger, P. Fischer, T. Brox, in *Lect. Notes Comput. Sci. (Including Subser.*  
731 *Lect. Notes Artif. Intell. Lect. Notes Bioinformatics)*, Springer Verlag, **2015**, pp. 234–241.
- 732 [21] A. Wolny, L. Cerrone, A. Vijayan, R. Tofanelli, A. V. Barro, M. Louveaux, C. Wenzl, S.  
733 Strauss, D. Wilson-Sánchez, R. Lymbouridou, S. S. Steigleder, C. Pape, A. Bailoni, S.  
734 Duran-Nebreda, G. W. Bassel, J. U. Lohmann, M. Tsiantis, F. A. Hamprecht, K.  
735 Schneitz, A. Maizel, A. Kreshuk, *Elife* **2020**, *9*, 1.
- 736 [22] M. Everingham, L. Van Gool, C. K. I. Williams, J. Winn, A. Zisserman, *Int. J. Comput.*  
737 *Vis.* **2010**, *88*, 303.
- 738 [23] C. Tischer, R. Pepperkok, **2019**, DOI 10.5281/zenodo.3522688.
- 739 [24] H. A. T. Goossens, M. K. E. Nohlmans, A. E. J. M. Van den Bogaard, *Infection* **1999**, *27*,  
740 231.
- 741 [25] B. Ladizinski, C. Sankey, *Am. J. Med.* **2014**, *127*, e9.
- 742 [26] M. H. Zweig, G. Campbell, *Clin. Chem.* **1993**, *39*, 561.
- 743 [27] K. Linnet, *Clin. Chem.* **1988**, *34*, 1379.
- 744 [28] B. J. McNeil, E. Keeler, S. J. Adelstein, *N. Engl. J. Med.* **1975**, *293*, 211.
- 745 [29] R. Lassaunière, A. Frische, Z. B. Harboe, A. C. Nielsen, A. Fomsgaard, K. A. Kroghelt,  
746 C. S. Jørgensen, *medRxiv* **2020**, 2020.04.09.20056325.



- 747 [30] N. M. A. Okba, M. A. Müller, W. Li, C. Wang, C. H. GeurtsvanKessel, V. M. Corman, M.  
748 M. Lamers, R. S. Sikkema, E. de Bruin, F. D. Chandler, Y. Yazdanpanah, Q. Le Hingrat,  
749 D. Descamps, N. Houhou-Fidouh, C. B. E. M. Reusken, B.-J. Bosch, C. Drosten, M. P.  
750 G. Koopmans, B. L. Haagmans, *Emerg. Infect. Dis.* **2020**, 26, DOI  
751 10.3201/eid2607.200841.
- 752 [31] R. Wölfel, V. M. Corman, W. Guggemos, M. Seilmaier, S. Zange, M. A. Müller, D.  
753 Niemeyer, T. C. Jones, P. Vollmar, C. Rothe, M. Hoelscher, T. Bleicker, S. Brünink, J.  
754 Schneider, R. Ehmman, K. Zwirgmaier, C. Drosten, C. Wendtner, *Nature* **2020**, 581,  
755 465.
- 756 [32] Q. X. Long, B. Z. Liu, H. J. Deng, G. C. Wu, K. Deng, Y. K. Chen, P. Liao, J. F. Qiu, Y.  
757 Lin, X. F. Cai, D. Q. Wang, Y. Hu, J. H. Ren, N. Tang, Y. Y. Xu, L. H. Yu, Z. Mo, F.  
758 Gong, X. L. Zhang, W. G. Tian, L. Hu, X. X. Zhang, J. L. Xiang, H. X. Du, H. W. Liu, C.  
759 H. Lang, X. H. Luo, S. B. Wu, X. P. Cui, Z. Zhou, M. M. Zhu, J. Wang, C. J. Xue, X. F.  
760 Li, L. Wang, Z. J. Li, K. Wang, C. C. Niu, Q. J. Yang, X. J. Tang, Y. Zhang, X. M. Liu, J.  
761 J. Li, D. C. Zhang, F. Zhang, P. Liu, J. Yuan, Q. Li, J. L. Hu, J. Chen, A. L. Huang, *Nat.*  
762 *Med.* **2020**, 1.
- 763 [33] F. Amanat, D. Stadlbauer, S. Strohmeier, T. H. O. Nguyen, V. Chromikova, M.  
764 McMahan, K. Jiang, G. A. Arunkumar, D. Jurczynszak, J. Polanco, M. Bermudez-  
765 Gonzalez, G. Kleiner, T. Aydiillo, L. Miorin, D. S. Fierer, L. A. Lugo, E. M. Kojic, J.  
766 Stoeber, S. T. H. Liu, C. Cunningham-Rundles, P. L. Felgner, T. Moran, A. García-  
767 Sastre, D. Caplivski, A. C. Cheng, K. Kedzierska, O. Vapalahti, J. M. Hepojoki, V.  
768 Simon, F. Krammer, *Nat. Med.* **2020**, DOI 10.1038/s41591-020-0913-5.
- 769 [34] F. Krammer, V. Simon, *Science* **2020**, 368, 1060.
- 770 [35] "Prevalence of COVID-19 in children in Baden-Württemberg Preliminary study report,"  
771 can be found under [https://www.klinikum.uni-](https://www.klinikum.uni-heidelberg.de/fileadmin/pressestelle/Kinderstudie/Prevalence_of_COVID-19_in_BaWu_.pdf)  
772 [heidelberg.de/fileadmin/pressestelle/Kinderstudie/Prevalence\\_of\\_COVID-](https://www.klinikum.uni-heidelberg.de/fileadmin/pressestelle/Kinderstudie/Prevalence_of_COVID-19_in_BaWu_.pdf)  
773 [19\\_in\\_BaWu\\_.pdf](https://www.klinikum.uni-heidelberg.de/fileadmin/pressestelle/Kinderstudie/Prevalence_of_COVID-19_in_BaWu_.pdf), **2020**.
- 774 [36] E. Bendavid, B. Mulaney, N. Sood, S. Shah, E. Ling, R. Bromley-Dulfano, C. Lai, Z.  
775 Weissberg, R. Saavedra, J. Tedrow, D. Tversky, A. Bogan, T. Kupiec, D. Eichner, R.  
776 Gupta, J. Ioannidis, J. Bhattacharya, *medRxiv* **2020**, 2020.04.14.20062463.
- 777 [37] E. Lavezzo, E. Franchin, C. Ciavarella, G. Cuomo-Dannenburg, L. Barzon, C. Del  
778 Vecchio, L. Rossi, R. Manganelli, A. Loregian, N. Navarin, D. Abate, M. Sciro, S.  
779 Merigliano, E. De Canale, M. C. Vanuzzo, V. Besutti, F. Saluzzo, F. Onelia, M. Pacenti,  
780 S. G. Parisi, G. Carretta, D. Donato, L. Flor, S. Cocchio, G. Masi, A. Sperduti, L.  
781 Cattarino, R. Salvador, M. Nicoletti, F. Caldart, G. Castelli, E. Nieddu, B. Labella, L.  
782 Fava, M. Drigo, K. A. M. Gaythorpe, A. R. Brazzale, S. Toppo, M. Trevisan, V. Baldo, C.  
783 A. Donnelly, N. M. Ferguson, I. Dorigatti, A. Crisanti, *Nature* **2020**, 584, 425.
- 784 [38] S. Stringhini, A. Wisniak, G. Piumatti, A. S. Azman, S. A. Lauer, H. Baysson, D. De  
785 Ridder, D. Petrovic, S. Schrempft, K. Marcus, I. Arm-Vernez, S. Yerly, O. Keiser, S.  
786 Hurst, K. Posfay-Barbe, D. Trono, D. Pittet, L. Getaz, F. Chappuis, I. Eckerle, N.  
787 Vuilleumier, B. Meyer, A. Flahault, L. Kaiser, I. Guessous, *medRxiv* **2020**,  
788 2020.05.02.20088898.
- 789 [39] E. G. Severance, I. Bossis, F. B. Dickerson, C. R. Stallings, A. E. Origoni, A. Sullens, R.

- 790 H. Yolken, R. P. Viscidi, *Clin. Vaccine Immunol.* **2008**, *15*, 1805.
- 791 [40] M. Qiu, Y. Shi, Z. Guo, Z. Chen, R. He, R. Chen, D. Zhou, E. Dai, X. Wang, B. Si, Y.  
792 Song, J. Li, L. Yang, J. Wang, H. Wang, X. Pang, J. Zhai, Z. Du, Y. Liu, Y. Zhang, L. Li,  
793 J. Wang, B. Sun, R. Yang, *Microbes Infect.* **2005**, *7*, 882.
- 794 [41] R. Pejchal, K. J. Doores, L. M. Walker, R. Khayat, P.-S. Huang, S.-K. Wang, R. L.  
795 Stanfield, J.-P. Julien, A. Ramos, M. Crispin, R. Depetris, U. Katpally, A. Marozsan, A.  
796 Cupo, S. Maloveste, Y. Liu, R. McBride, Y. Ito, R. W. Sanders, C. Ogohara, J. C.  
797 Paulson, T. Feizi, C. N. Scanlan, C.-H. Wong, J. P. Moore, W. C. Olson, A. B. Ward, P.  
798 Poignard, W. R. Schief, D. R. Burton, I. A. Wilson, *Science* **2011**, *334*, 1097.
- 799 [42] R. Pepperkok, J. Ellenberg, *Nat. Rev. Mol. Cell Biol.* **2006**, *7*, 690.
- 800 [43] M. Bickle, *Anal. Bioanal. Chem.* **2010**, *398*, 219.
- 801 [44] T. Zimmermann, J. Rietdorf, R. Pepperkok, *FEBS Lett.* **2003**, *546*, 87.
- 802 [45] M. Doan, A. E. Carpenter, *Nat. Mater.* **2019**, *18*, 414.
- 803 [46] S. Berg, D. Kutra, T. Kroeger, C. N. Straehle, B. X. Kausler, C. Haubold, M. Schiegg, J.  
804 Ales, T. Beier, M. Rudy, K. Eren, J. I. Cervantes, B. Xu, F. Beuttenmueller, A. Wolny, C.  
805 Zhang, U. Koethe, F. A. Hamprecht, A. Kreshuk, *Nat. Methods* **2019**, *16*, 1226.
- 806 [47] D. Tomazevic, B. Likar, F. Pernus, *J. Microsc.* **2002**, *208*, 212.
- 807 [48] J. C. Caicedo, A. Goodman, K. W. Karhohs, B. A. Cimini, J. Ackerman, M. Haghighi, C.  
808 Heng, T. Becker, M. Doan, C. McQuin, M. Rohban, S. Singh, A. E. Carpenter, *Nat.*  
809 *Methods* **2019**, *16*, 1247.
- 810 [49] N. Sofroniew, K. Evans, T. Lambert, J. Nunez-Iglesias, A. C. Solak, kevin yamauchi, G.  
811 Buckley, T. Tung, J. Freeman, H. Har-Gil, P. Boone, L. Royer, S. Axelrod, jakirkham, R.  
812 Dunham, P. Vemuri, M. Huang, Bryant, A. Rokem, S. Li, R. Anderson, M. Bussonnier, J.  
813 Kiggins, Hector, H. Patterson, G. Gay, E. Perlman, D. Bennett, C. Gohlke, A. de  
814 Siqueira, **2020**, DOI 10.5281/ZENODO.3689231.
- 815 [50] S. Koranne, in *Handb. Open Source Tools*, Springer US, Boston, MA, **2011**, pp. 191–  
816 200.
- 817 [51] S. van der Walt, J. L. Schönberger, J. Nunez-Iglesias, F. Boulogne, J. D. Warner, N.  
818 Yager, E. Gouillart, T. Yu, *PeerJ* **2014**, *2*, e453.
- 819 [52] J. Schindelin, I. Arganda-Carreras, E. Frise, V. Kaynig, M. Longair, T. Pietzsch, S.  
820 Preibisch, C. Rueden, S. Saalfeld, B. Schmid, J.-Y. Tinevez, D. J. White, V. Hartenstein,  
821 K. Eliceiri, P. Tomancak, A. Cardona, *Nat. Methods* **2012**, *9*, 676.

822

823 **Figures and tables**

824

| <b>Negative cohort</b> | <b>IF IgM</b>   | <b>IF IgA</b>   | <b>IF IgG</b>   | <b>ELISA IgA</b>              | <b>ELISA IgG</b>            |
|------------------------|-----------------|-----------------|-----------------|-------------------------------|-----------------------------|
| <b>B (n=105)</b>       | 1               | 0               | 1               | 7                             | 5                           |
| <b>A (n=34)</b>        | 0               | 0               | 1               | 3                             | 1                           |
| <b>Z (n=22)</b>        | 0               | 0               | 0               | 2                             | 0                           |
| <b>E (n=57)</b>        | 0               | 0               | 0               | 11                            | 1                           |
| <b>Total (n=218)</b>   | <b>1 (0,5%)</b> | <b>0 (0,0%)</b> | <b>2 (0,9%)</b> | <b>23<sup>a</sup> (10,6%)</b> | <b>7<sup>a</sup> (3,2%)</b> |

825 **Table 1: Summary of positive results for the negative control samples obtained by ELISA**  
 826 **and IF.** The classification of positive or borderline results in ELISA followed the definition of the  
 827 test manufacturer. The classification in IF is described in materials and methods. Positive IgA  
 828 and IgG ELISA readings were derived from the same sample. Cohort B = healthy donors, cohort  
 829 A = patients that tested positive for ccCoV (all four types of ccCoV represented), cohort Z =  
 830 patients with diagnosed *Mycoplasma pneumoniae*, cohort E = patient with diagnosed EBV or  
 831 CMV infection. <sup>a</sup> – borderline values were considered positive.

832

---

| <b>days post symptom onset</b> | <b>IF IgM</b>   | <b>IF IgA</b>   | <b>IF IgG</b>   | <b>ELISA IgA</b> | <b>ELISA IgG</b> |
|--------------------------------|-----------------|-----------------|-----------------|------------------|------------------|
| < 11 (n=17)                    | 7 (41%)         | 9 (53%)         | 7 (41%)         | 11 (65%)         | 3 (18%)          |
| 11-14 (n=24)                   | 18 (75%)        | 19 (79%)        | 19 (79%)        | 19 (79%)         | 16 (67%)         |
| >14 (n=16)                     | 16 (100%)       | 16 (100%)       | 16 (100%)       | 16 (100%)        | 16 (100%)        |
| <b>Total (n=57)</b>            | <b>42 (73%)</b> | <b>44 (77%)</b> | <b>42 (73%)</b> | <b>46 (80%)</b>  | <b>34 (60%)</b>  |

---

833 **Table 2: Positive results obtained for sera from COVID-19 patients collected at the**  
834 **indicated days post symptom onset.**

835 Figure 1.

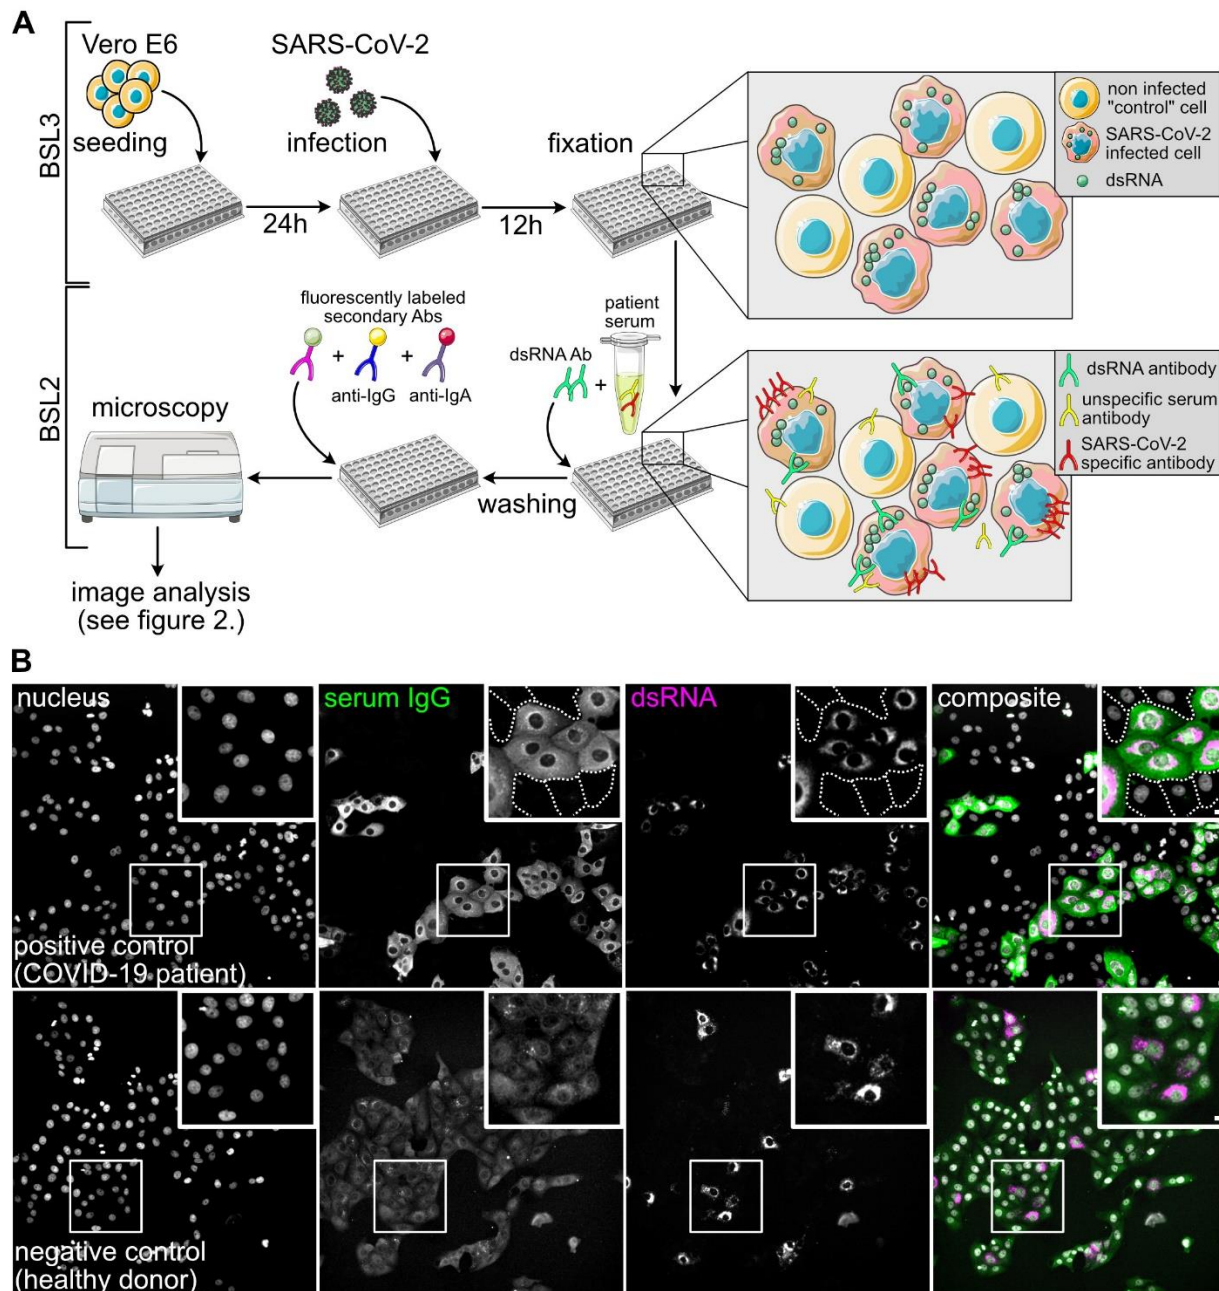

836  
837

838 **Figure 1: Principle of the immunofluorescence assay for SARS-CoV-2 antibody detection.**  
839 (A) Scheme of the IF workflow and the concept for SARS-CoV-2 antibody detection. (B)  
840 Representative images showing immunofluorescence results using a COVID-19 patient serum  
841 (positive control, upper panels) and a negative control serum (lower panels), followed by staining  
842 with an AlexaFluor488-coupled anti-IgG secondary antibody. Nuclei (grey), IgG (green), dsRNA  
843 (magenta) channels and a composite image are shown. White boxes mark the zoomed areas.

844 Dashed lines mark borders of non-infected cells which are not visible at the chosen contrast  
845 setting. Note that the upper and lower panels are not recorded and displayed with the same  
846 brightness and contrast settings. In the lower panels the brightness and contrast scales have  
847 been expanded in order to visualize cells in the IgG serum channel where only background  
848 staining was detected. Scale bar is 20  $\mu\text{m}$  in overview and 10  $\mu\text{m}$  in the insets.

849 Figure 2.

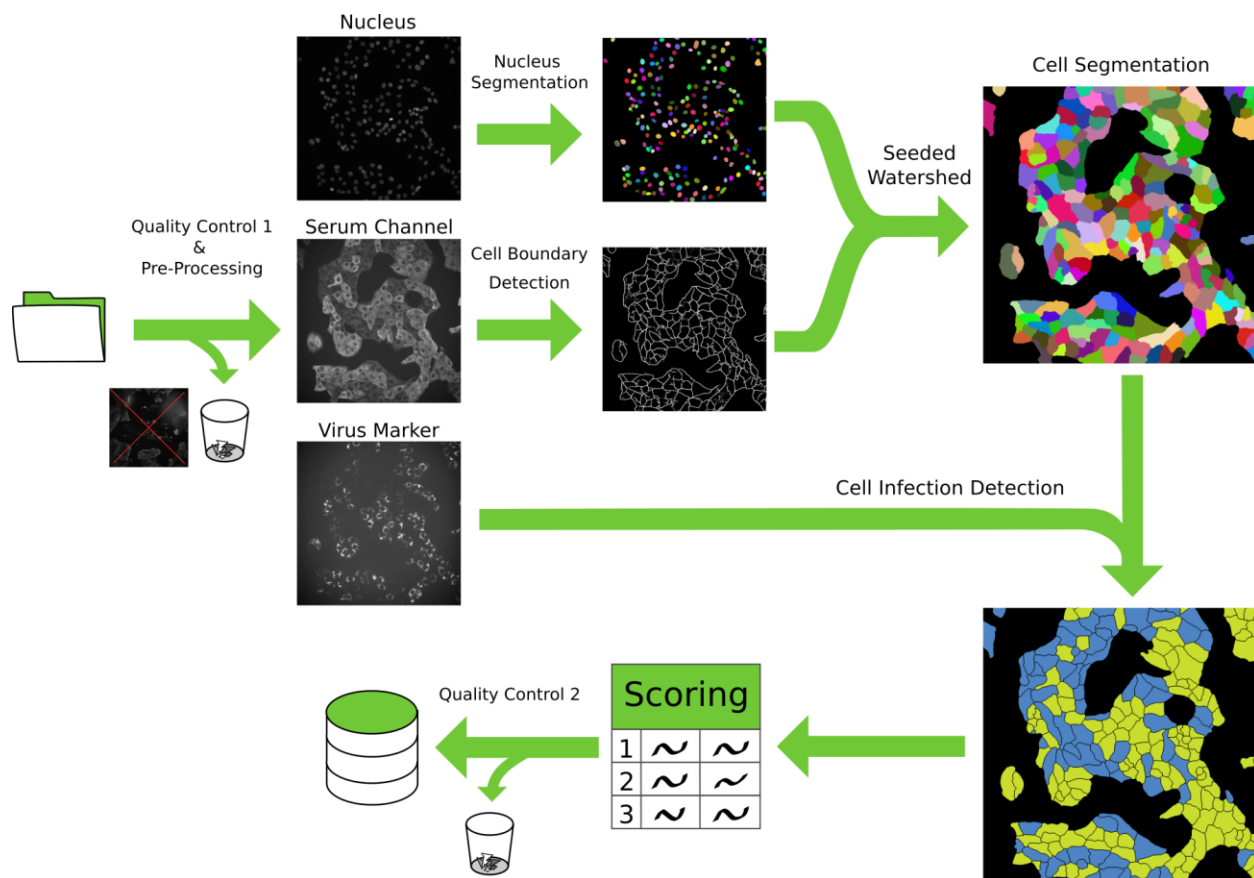

850

851

852 **Figure 2: Schematic overview of the image processing pipeline.** Initially, images are  
853 subjected to the first manual quality control, where images with acquisition defects are  
854 discarded. A pre-processing step is then applied to correct for barrel artifacts. Subsequently,  
855 segmentation is obtained via seeded watershed, this algorithm requires seeds obtained from  
856 StarDist segmentation of the nuclei and boundary evidence computed using a neural network.  
857 Lastly, using the virus marker channel we classify each cell as infected or not infected and we  
858 computed the scoring. A final automated quality control identifies and automatically discards  
859 non-conform results. All intermediate results are saved in a database for ensuring fully  
860 reproducibility of the results.

861 Figure 3.

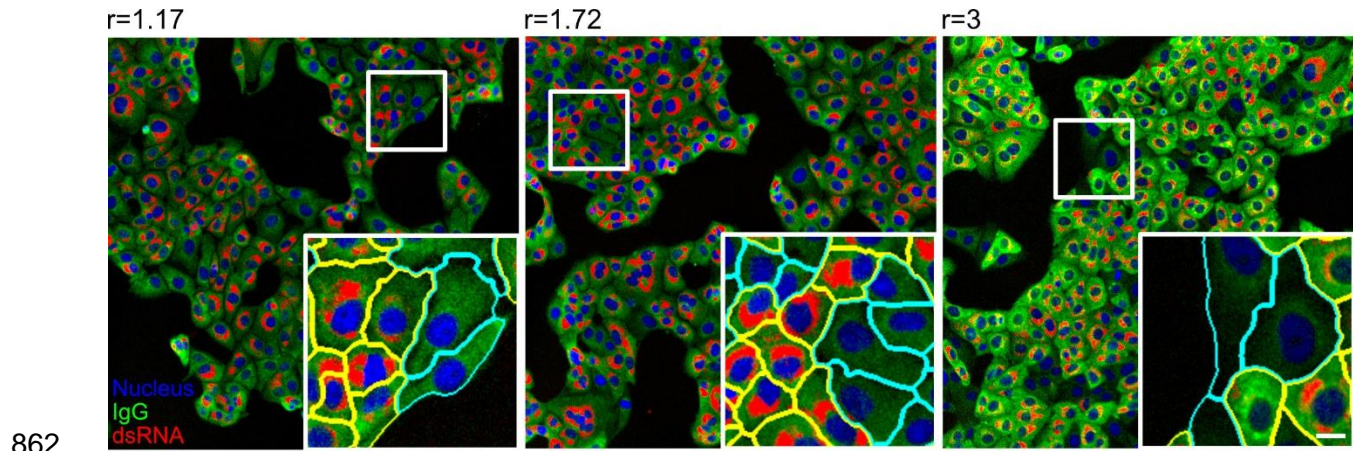

863

864 **Figure 3: Examples of results from the automated image analysis pipeline.** Panels display  
865 images that correspond to three different ratio scores (ratio score is indicated above the image)  
866 determined from samples stained with three different human sera, followed by staining with an  
867 anit-IgG secondary antibody coupled to AlexaFluore488. Images represent overlays of three  
868 channels - nuclei (blue), IgG (green) and dsRNA (red). White boxes mark the zoomed area.  
869 Cells in the insets are highlighted with yellow or cyan boundaries, indicating infected and non-  
870 infected cells, respectively. Scale bar = 10  $\mu\text{m}$ .



871 Figure 4.

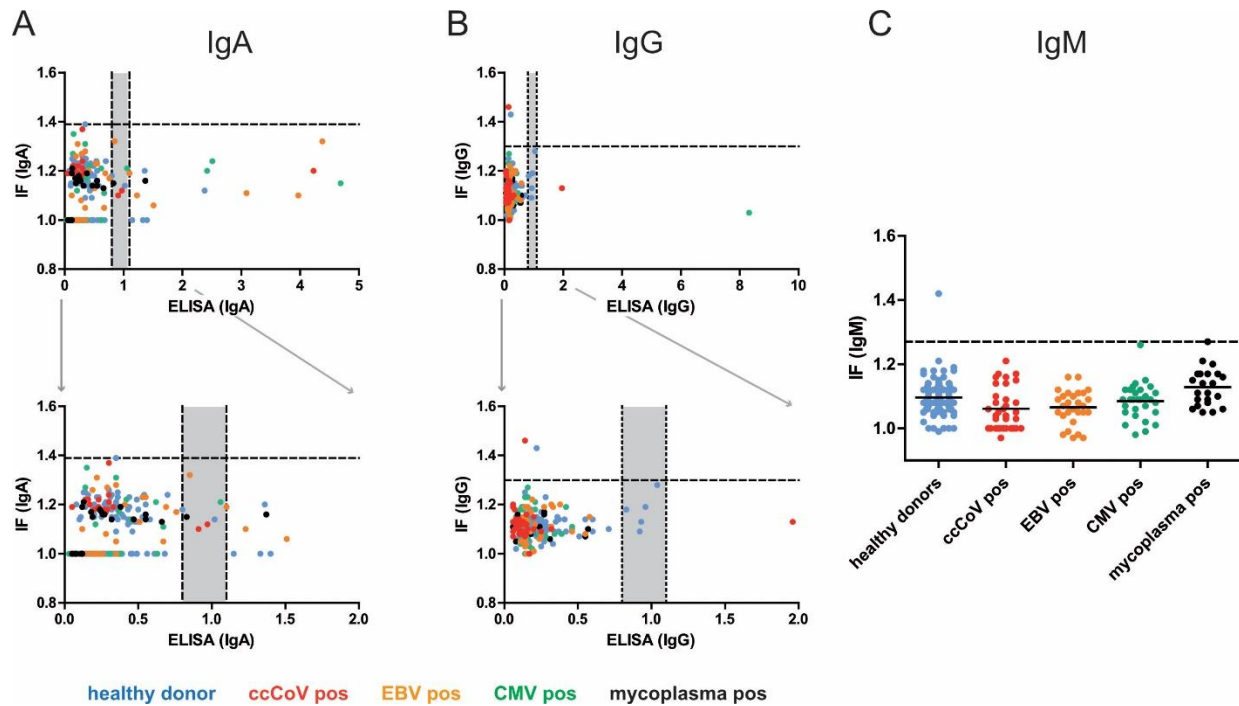

873

874 **Figure 4: Correlation between SARS-CoV-2 specific IF and ELISA results for the negative**  
875 **control panel obtained in IgA (A) or IgG (B) measurements.** Each dot represents one serum  
876 sample. Blue, healthy donors; red, ccCoV positive; green, CMV positive; orange, EBV positive;  
877 black, mycoplasma positive. Bottom panels represent zoomed-in versions of the respective top  
878 panel to illustrate the borderline region. **(C)** IgM values for the indicated negative control cohorts  
879 determined by IF. Since a corresponding IgM specific ELISA kit from Euroimmun was not  
880 available, correlation was not analysed in this case. In some cases, antibody binding above  
881 background was undetectable by IF in non-infected as well as in infected cells, indicating low  
882 unspecific cross-reactivity and lack of specific reactivity of the respective serum. In order to allow  
883 for inclusion of these data points in the graph, the IF ratio was set to 1,0. Dotted lines indicate  
884 the optimal separation cut-off values defined for sample classification, grey areas indicate  
885 borderline results in ELISA.

886

887 Figure 5.

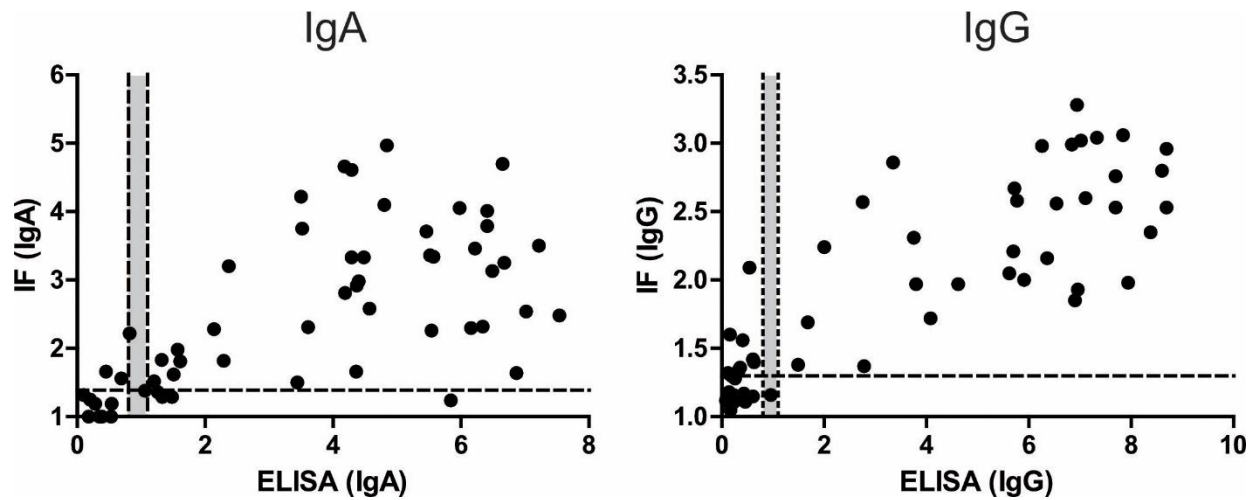

888

889

890 **Figure 5: Correlation between IgA or IgG values obtained by ELISA and IF for sera from**  
891 **29 COVID-19 patients collected at different days post infection.** In some cases, antibody  
892 binding above background was undetectable by IF in non-infected as well as in infected cells,  
893 indicating low unspecific cross-reactivity and lack of specific reactivity of the respective serum.  
894 In order to allow for inclusion of these data points in the graph, the IF ratio was set to 1,0. Dotted  
895 lines indicate the cut-off values defined for classification of readouts, grey areas indicate  
896 borderline values.

897

898 Figure 6.

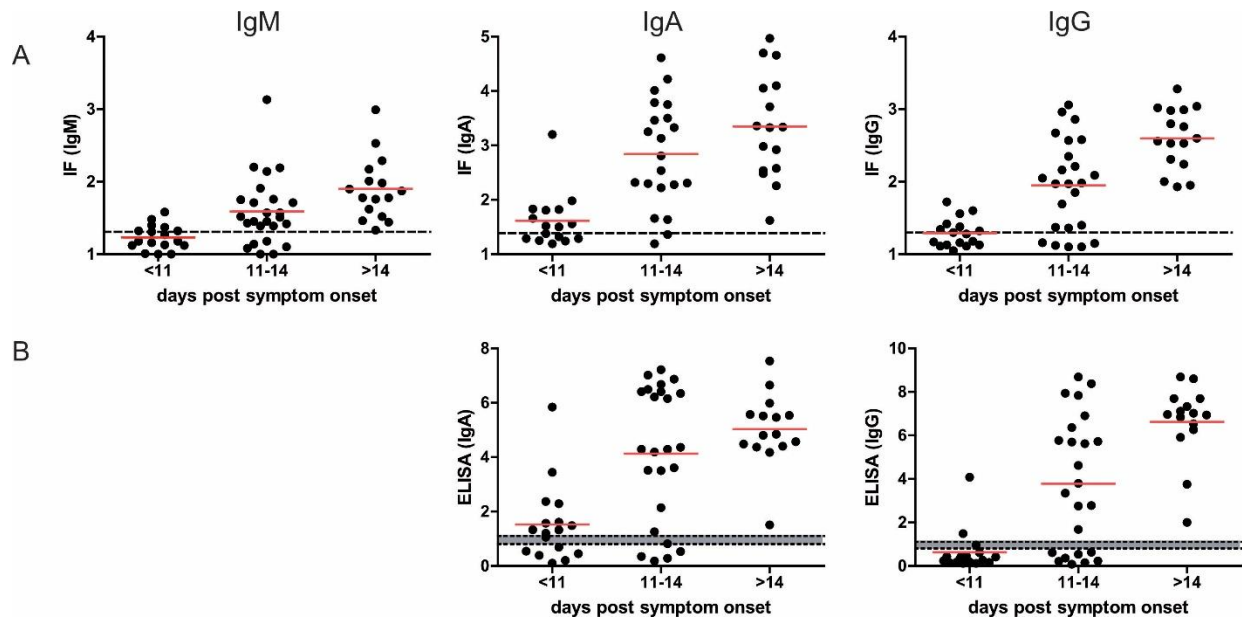

899

900

901 **Figure 6: Detection of SARS-CoV-2 specific antibodies in sera from COVID-19 patients.**

902 (A) Fifty-seven serum samples from 29 PCR confirmed patients collected at the indicated times

903 post symptom onset were analysed by the IF workflow for the presence of SARS-CoV-2 specific

904 IgM, IgA and IgG antibodies. Each dot represents one serum sample. Red line: mean value;

905 dotted line: cut-off between negative and positive values. (B) The same samples as in A were

906 analysed by ELISA for the presence of SARS-CoV-2 specific IgA and IgG antibodies. Each dot

907 represents one serum sample. Red line: mean value; dotted lines: cut-off; grey zone: borderline.

908
