# Microscopy-based assay for semi-quantitative detection of SARS-CoV-2 specific antibodies in human sera

Authors: Constantin Pape<sup>1,2,\*</sup>, Roman Remme<sup>1,\*</sup>, Adrian Wolny<sup>1,2</sup>, Sylvia Olberg<sup>3</sup>, Steffen Wolf<sup>1</sup>, Lorenzo Cerrone<sup>1</sup>, Mirko Cortese<sup>4</sup>, Severina Klaus<sup>5</sup>, Bojana Lucic<sup>6</sup>, Stephanie Ullrich<sup>3</sup>, Maria Anders-Össwein<sup>3</sup>, Stefanie Wolf<sup>3</sup>, Cerikan Berati<sup>4</sup>, Christopher Neufeld<sup>4</sup>, Markus Ganter<sup>5</sup>, Paul Schnitzler<sup>3</sup>, Uta Merle<sup>7</sup>, Marina Lusic<sup>6</sup>, Steeve Boulant<sup>3,8</sup>, Megan Stanifer<sup>4,8</sup>, Ralf Bartenschlager<sup>4,9</sup>, Fred A. Hamprecht<sup>1</sup>, Anna Kreshuk<sup>2</sup>, Christian Tischer<sup>2</sup>, Hans-Georg Kräusslich<sup>3,9</sup>, Barbara Müller<sup>3,#</sup> and Vibor Laketa<sup>3,9,#</sup>

<sup>1</sup>HCI/IWR, Heidelberg University, Heidelberg, Germany

<sup>2</sup>European Molecular Biology Laboratory, Heidelberg, Germany

<sup>3</sup>Department of Infectious Diseases, Virology, University Hospital Heidelberg, Heidelberg, Germany

<sup>4</sup>Department of Infectious Diseases, Molecular Virology, University Hospital Heidelberg, Heidelberg, Germany

<sup>5</sup>Department of Infectious Diseases, Parasitology, University Hospital Heidelberg, Heidelberg, Germany

<sup>6</sup>Department of Infectious Diseases, Integrative Virology, University Hospital Heidelberg, Heidelberg, Germany

<sup>7</sup>Department of Gastroenterology and Hepatology, University Hospital of Heidelberg, Heidelberg, Germany

<sup>8</sup>Research Group “Cellular polarity and viral infection”, German Cancer Research Center (DKFZ), Heidelberg, Germany

<sup>9</sup>German Center for Infection Research, Heidelberg, Germany

#Corresponding authors: Vibor Laketa, Department of Infectious Diseases, Virology, University Hospital Heidelberg, Im Neuenheimer Feld 344, 69120 Heidelberg, Germany, Email: [vibor.laketa@med.uni-heidelberg.de](mailto:vibor.laketa@med.uni-heidelberg.de) and Barbara Müller, Department of Infectious Diseases, Virology, University Hospital Heidelberg, Im Neuenheimer Feld 344, 69120 Heidelberg, Germany, Email: [barbara.mueller@med.uni-heidelberg.de](mailto:barbara.mueller@med.uni-heidelberg.de)

\*equal contribution

## Abstract

Emergence of the novel pathogenic coronavirus Sars-CoV-2 and its rapid pandemic spread presents numerous questions and challenges that demand immediate attention. Among these is the urgent need for a better understanding of humoral immune response against the virus and assessment of seroprevalence levels in the population, both of which form the basis for developing public health strategies to control viral spread. For this sensitive, specific and quantitative serological assays are required. Here, we describe the development of a semi-quantitative high-content microscopy-based assay for detection of three major classes (IgG, IgA and IgM) of Sars-CoV-2 specific antibodies in human samples. The possibility to detect antibodies against the entire viral proteome together with a robust semi-automated image analysis workflow resulted in improvement of sensitivity and specificity compared to an approved ELISA-based diagnostic test. Combining both resulted in maximum specificity in a negative control cohort, while maintaining high sensitivity. The procedure described here is compatible with high-throughput microscopy approaches and may be applied for serological analysis of other virus infections.

## Introduction

The emergence of the novel pathogenic coronavirus Sars-CoV-2 at the end of 2019<sup>1-3</sup> and the rapid pandemic spread of the virus had dramatic consequences in all affected countries. In the absence of a protective vaccine or a causative antiviral therapy for COVID-19 patients, testing for Sars-CoV-2 infection and tracking of transmission and outbreak events are of paramount importance to control viral spread and avoid the overload of healthcare systems. The sequence of the viral genome became publicly available only weeks after the initial reports on COVID-19 via the community online resource virological.org and allowed rapid development of reliable and standardized quantitative RT-PCR (qPCR) based tests for direct virus detection in nasopharyngeal swab specimens<sup>4</sup>. These tests are the key to identify acutely infected individuals and monitor virus load as a basis for the implementation of quarantine measures and treatment decisions.

In response to the initial wave of COVID-19 infection many countries implemented more or less severe lockdown strategies, resulting in a gradual decrease in the rate of new infections and deaths<sup>5</sup>. With gradual release of these lockdown strategies, monitoring and tracking of Sars-CoV-2 specific antibody levels becomes highly important. Many critical aspects of the humoral immune response against Sars-CoV-2 are currently not well understood. For example, Sars-CoV-2 infection is frequently accompanied by relatively mild symptoms and may also occur asymptomatic<sup>6,7</sup>. In addition, many COVID-19 cases may be undocumented due to limitations in the testing capacity and availability of hospital care especially in areas of high infection rate. Therefore, the proportion of asymptomatic carriers and levels of infection in the general population in different countries remain largely unknown. Any public health control strategy aiming at regulating human mobility and social behavior in order to suppress the infection rate will have to take into account the proportion of seropositive individuals in the population<sup>8</sup>. Further, there is evidence that age is a factor that influences the outcome of exposure to the virus. Data from countries with widespread Sars-CoV-2 infection revealed that young children rarely suffer from severe COVID-19 respiratory symptoms<sup>9,10</sup>. However, whether this correlation indicates lower susceptibility to infection and/or is due to lower or different pathogenicity of the virus in children is a matter of debate. Other important open questions are how antibody levels are correlated to the titer of neutralizing antibodies, and how these titers in turn correlate to protection against reinfection. Finally, the dynamics of antibody development in different age groups, in severe, mild or asymptomatic infections, or under different treatment conditions, as well as the duration of a potential antibody response remain to be investigated. Answers to all of these questions are crucial elements for planning strategies to control the disease. Thus, there is an urgent need for specific, sensitive and reliable methods for the quantitative detection of Sars-CoV-2 specific antibodies in human specimens.

Compared to the RNA based approach for direct virus diagnostics, development of test systems for detection of Sars-CoV-2 specific antibodies proved to be more challenging. Due to the emergency of the situation initially marketed test kits underwent a very rapid development and approval process, with low numbers of samples used for validation; consequently, sensitivity and specificity of the test systems often failed to meet the practical requirements<sup>11</sup>. In particular, cross reactivity of antibodies against circulating common cold coronaviruses (strains OC43, NL63, 229E and HKU1) are of concern in this respect as it was observed in case of serological tests developed for closely related Sars-CoV and Mers-CoV<sup>12</sup>. Developments in the past months have resulted in improvements of commercially available antibody tests, and better validated

ELISA or (electro)chemoluminescence based diagnostic kits are available. Nevertheless, given the likely currently low percentage of seropositive individuals in the low one-digit range<sup>13-15</sup> and estimated seroprevalence of antibodies against common cold coronaviruses of over 90% in the global population<sup>16</sup>, even tests with a specificity of 99% are bound to yield a high proportion of false positive results in studies screening cohorts from the general public. Thus, strategies to test for Sars-CoV-2 antibodies which combine increased sensitivity and specificity with high information content (antibody levels, class of antibodies, viral target protein or peptide) with quantitative information and high sample throughput are urgently needed.

Immunofluorescence (IF) using virus infected cells as a specimen is a classical serological approach in virus diagnostics and has also been employed for coronaviruses, including the closely related virus Sars-CoV<sup>17-19</sup>. The advantages of IF are (i) that it does not depend on specific diagnostic reagent kits or instruments, (ii) that the specimen contains all viral antigens expressed under near-native conditions and (iii) that the method offers potential for high information content (semi-quantitative assessment; differentiation of staining patterns due to reactivity against various viral proteins) and high throughput. A disadvantage of the classical IF approach is the involvement of manual handling steps. Furthermore, the classification of samples based on visual inspection of micrographs is subjective and thus not well standardized; further, only binary results are obtained. Here, we present the development and validation of a semi-quantitative, semi-automated workflow for Sars-CoV-2 specific antibody detection. With its 96-well format, semi-automated microscopy and automated image analysis workflow it combines advantages of IF with a reliable and objective semi-quantitative readout. Whereas the protocol was developed in response to the ongoing Sars-CoV-2 pandemic, the method described here can be adapted for the study of other viral infections.

## Results

### Setup of the IF assay for SARS-CoV-2 antibody detection

We decided to use cells infected with Sars-CoV-2 as samples for our IF analyses, since this setup provides the best chance for detection of antibodies targeted at the different viral proteins expressed in a near-natural context. African green monkey kidney epithelial cells (VeroE6 cell line) have already been used for infection with Sars-CoV-2, virus production and IF<sup>3,20</sup>. In preparation for this study we compared different cell lines for use in infection and IF

experiments, but all tested cell lines were found to be inferior to VeroE6 cells for our purposes (see Materials and Methods and Supplementary Figure 1). All following experiments were thus carried out using the VeroE6 cell line.

In order to allow for clear identification of positive reactivity in spite of a variable and sometimes high nonspecific background from human sera, our strategy involves a direct comparison of the IF signal from infected and non-infected cells in the same sample. Preferential antibody binding to infected compared to non-infected cells indicates the presence of specific SARS-CoV-2 antibodies in the examined serum. Under our conditions, infection rates of ~40-80% of the cell population were achieved, allowing for a comparison of infected and non-infected cells in the same well. An antibody that detects dsRNA produced during viral replication was used to distinguish infected from non-infected cells within the same field of view (Figure 1A).

In order to define the conditions for immunostaining using human serum, we selected a small panel of negative and positive control sera. Four sera from healthy donors collected before November 2019 were chosen as negative controls, and eight sera from PCR confirmed COVID-19 inpatients collected at day 14 or later post symptom onset were employed as positive controls. Sera from this test cohort were used for primary staining, and bound antibodies were detected using fluorophore-coupled secondary antibodies against human IgG, IgA or IgM.

No difference between infected and non-infected cells in serum IgG antibody binding was observed when sera collected before the start of the Sars-CoV-2 pandemic were examined (Figure 1B, Supplementary Figure 2). In contrast, when examining COVID-19 patient serum, we clearly detected higher serum IgG antibody binding to infected compared to non-infected cells (Figure 1B). All eight COVID-19 patient serum samples yielded higher IgG binding to infected compared to non-infected cells as assessed by visual inspection (Supplementary Figure 2). Similar results were obtained when an IgA or IgM specific secondary antibody was used for detection (Supplementary Figure 3). In order to allow for the parallel assessment of IgG and IgA or IgM antibodies, we established conditions for the parallel detection of anti-IgG coupled to AlexaFluor488 and anti-IgA or anti-IgM coupled to DyLight650 or AlexaFluor647 secondary antibodies, respectively, without signal bleedthrough. Using this approach, it was possible to implement detection of SARS-CoV-2 specific IgG and IgA or IgM antibodies in a single experimental setup (Supplementary Figure 4).

Titration experiments were performed with positive control sera to determine the optimal range of serum concentration in the IF experiments. All eight positive control samples showed visually detectable specific labeling of infected cells over the range of 1:10<sup>2</sup> and 1:10<sup>5</sup>, demonstrating robustness of the assay (Supplementary Figure 5). Serum concentrations of less than 1:10<sup>5</sup> did not yield detectable signals in all cases. We decided to employ a dilution of 1:10<sup>2</sup> in the further experiments

## Image analysis

Our next aim was to establish a semi-automated analysis workflow for image acquisition and analysis for a medium-high throughput setting. VeroE6 cells were seeded into 96-well plates infected and immunostained using anti-dsRNA antibody and patient serum, followed by indirect detection using a mixture of anti-IgG and anti-IgA/IgM secondary antibodies. Images were acquired using an automated widefield microscope (see Materials and Methods section for more details) .

To obtain a measure for specific antibody binding, we performed automated segmentation of cells and classified them into infected and non-infected cells based on the dsRNA staining. We then measured fluorescence intensities in the serum channel per cell as a proxy for the amount of bound antibodies for both infected and non-infected cells and calculated the ratio between these values for infected and non-infected cells in a given sample. To afford training of a machine learning approach for the cell segmentation, and to directly evaluate the infected cell classification, we manually labeled cells and annotated them as infected/non-infected in 10 images chosen from 5 positive and 5 control samples. Figure 2 presents a graphical overview of all analysis steps; the full description of every step can be found in Materials and Methods. Briefly, our approach works as follows:

First, we manually discarded all images that contained obvious artefacts such as large dust particles or dirt and out-of-focus images. Then, images were processed to correct for the uneven illumination profile in each channel. Next, we segmented individual cells with a seeded watershed algorithm<sup>21</sup>, using nuclei segmented via StarDist<sup>22</sup> as seeds and boundary predictions from a U-Net<sup>23,24</sup> as a heightmap. We evaluated this approach using leave-one-image-out cross-validation on the manual annotations and measured an average precision<sup>25</sup> of 0.77 +- 0.08 (i.e., on average 77% of segmented cells are matched correctly to the corresponding cell in the annotations). Combined with extensive automatic quality control which discards outliers in the

results, the segmentation was found to be of sufficient quality for our analysis, especially since robust intensity measurements were used to reduce the effect of remaining errors.

We then classified the segmented cells into infected and non-infected, by measuring the 95th percentile intensities in the dsRNA channel and classifying cells as infected if this value exceeded 4.8 times the noise level, determined by the mean absolute deviation. This factor and the percentile were determined empirically using grid search on the manually annotated images (see above). Using leave-one-out cross validation on the image level, we found that this approach yields an average F1-score of 84.3%.

In order to make our final measurement more reliable, we then discarded whole wells, images or individual segmented cells based on quality control criteria that were determined by inspection of initial results. Those criteria include a minimal number of non-infected cells per well; minimal and maximal number of cells per image; minimal cell intensities for images; and minimal and maximal sizes of individual cells (see Materials and Methods for full details).

To score each sample, we computed the intensity ratio  $r$  :

$$r = \frac{m_I}{m_N} \tag{Eq. 1}$$

Here,  $m_I$  is the median serum intensity of infected cells and  $m_N$  the median serum intensity of non-infected cells. For each cell, we compute its intensity by computing the mean pixel intensity in the serum channel (excluding the nucleus area where we typically did not observe serum binding) and then subtracting the background intensity, which is measured on two control wells that did not contain any serum.

We used efficient implementations for all processing steps and deployed the analysis software on a computer cluster in order to enhance the speed of imaging data processing. For visual inspection, we have further developed an open-source software tool (PlateViewer) for interactive visualization of high-throughput microscopy data<sup>26</sup>. PlateViewer was used in a final quality control step to visually inspect positive hits. For example, PlateViewer inspection allowed identifying a characteristic spotted pattern co-localizing with the dsRNA staining (Supplementary Figure 6) that was sometimes observed in the IgA channel upon staining with negative control serum. In contrast, sera from COVID-19 patients typically displayed cytosol, ER-like and plasma membrane staining patterns in this channel (Figure 1B, Supplementary Figure 3). The dsRNA co-localizing pattern observed for sera from the negative control cohort is by definition non-



specific for Sars-CoV-2, but would be classified as a positive hit based on staining intensity alone. Using PlateViewer, we performed a quality control on all IgA positive hits and removed those displaying the spotted pattern colocalizing with dsRNA signal from further analysis.

## Assay characterization and validation

With the immunofluorescence protocol and automated image analysis in place we proceeded to test a larger number of control samples in a high throughput compatible manner for assay validation. All samples were processed for IF as described above, and in parallel analyzed by a commercially available semi-quantitative Sars-CoV-2 ELISA approved for diagnostic use (Euroimmun, Lübeck, Germany) for the presence of Sars-CoV-2 specific IgG and IgA antibodies.

As outlined above, a main concern regarding serological assays for Sars-CoV-2 antibody detection is the occurrence of false positive results. A particular concern in this case is cross-reactivity of antibodies that originated from infection with any of the four types of common cold Corona viruses (ccCoV) circulating in the population. Although the highly immunogenic major structural proteins of Sars-CoV-2 nucleocapsid (N) and spike (S) protein, have an overall homology of ~30%<sup>3</sup> to their counterparts in ccCoV, subdomains of these proteins display higher homology and the cross-reactivity with ccCoV has been discussed as the major reason for false positive detection in serological tests for closely related Sars-CoV and Mers-CoV<sup>12</sup>. Also, acute infection with Epstein-Barr virus (EBV) or cytomegalovirus (CMV) may result in unspecific reactivity of human sera<sup>27,28</sup>. We therefore selected a negative control panel consisting of 219 sera collected before the fall of 2019, comprising samples from healthy donors (n=105, cohort B), patients that tested positive for ccCoV several months before the blood sample was taken (n=34, all four types of ccCoV represented; cohort A), as well as patients with diagnosed *Mycoplasma pneumoniae* (n=22; cohort Z), EBV or CMV infection (n=58, cohort E). We further selected a panel of 57 sera from 29 RT-PCR confirmed COVID-19 patients collected at different days post symptom onset as a positive sample set (cohort C, see below).

Sera were employed as primary antisera for IF staining using IgM, IgA or IgG specific secondary antibodies, and samples were imaged and analyzed as described above. This procedure yielded a ratiometric intensity score for each serum sample. Based on the scores obtained for the negative control cohort and the patient sera, we defined the threshold separating negative from positive scores for each of the antibody channels. For this, we performed ROC



curve analysis<sup>29-31</sup> on a subset of the data (cohorts A, B, C, Z). Using this approach, it is possible to take the relative importance of sensitivity versus specificity into account for optimal threshold definition. By giving more weight to false positive or false negative results, one can adjust the threshold dependent on the context of the study. Whereas high sensitivity is of importance for e.g. monitoring seroconversion of a patient known to be infected, high specificity is crucial for population based screening approaches, where large study cohorts characterized by low seroprevalence are tested. Since we envision the use of the assay for screening approaches, we decided to assign more weight to specificity at the cost of sensitivity for our analyses (see Materials and Methods for an in-depth description of the analysis). Optimal separation in this case was given using threshold values of 1.39, 1.31 and 1.27 for IgA, IgG and IgM channels respectively (Supplementary Figure 7). We validated the classification performance on negative control cohort E (n=58) which was not seen during threshold selection, and detected no positive results. Results from the analysis of the negative control sera are presented in Figure 4 and Table 1.

While the majority of samples were tested negative in ELISA measurements as well as in the IF analyses, some positive readings were obtained in each of the assays. Since samples from these cohorts were collected between 2015 and 2019 and donors were therefore not exposed to Sars-CoV-2 before sampling, these readings represent false positives. Of note, negative control cohort E displayed a particularly high rate of false positives in ELISA measurements, but not in IF (Table 1). We conclude that the threshold values determined achieve our goal of yielding highly specific results (at the cost of sub-maximal sensitivity).

Roughly 8% (IgA) or 3% (IgG) of the samples were classified as positive or potentially positive by ELISA (Table 1). The notably lower specificity of the IgA determination in a seronegative cohort observed here is in accordance with findings in other studies<sup>32,33</sup> and information provided by the manufacturer of the test (90,5% for IgA vs. 99,3% for IgG; Euroimmun Sars-CoV-2 data sheet, April 24, 2020). The respective false-positive numbers obtained based on IF, 0% for IgA and 0,9% for IgG, were lower, indicating moderately higher specificity of the IF readout compared to the ELISA measurements. Importantly, however, false positive readings did not correlate between ELISA and IF (Figure 4). Thus, classifying only samples that test positive in both assays as true positives resulted in the elimination of false positive results (0 of 219 positives detected). We conclude that applying both methods in parallel and using the 'double positive' definition for classification notably improves specificity of Sars-CoV-2 antibody detection.

In order to determine the sensitivity of our IF assay, we employed 57 sera from 29 symptomatic COVID-19 patients that had been RT-PCR confirmed for Sars-CoV-2 infection. Archived sera from these patients had been collected in the range between day 5 and 27 post symptom onset. Again, samples were measured both in IF and ELISA, and the correlation between the quantitative values was assessed as shown in Figure 5. While there were deviations in the height of the values, positive correlation was evident in both cases, with values for the IgG readout being more congruent than those for the less specific IgA determination (Pearson r: 0,847 for IgG; 0,599 for IgA).

For an assessment of sensitivity, we stratified the samples according to the day post symptom onset, as shown in Figure 6. For both methods, and for all antibody classes, mean values and the proportion of positive samples increased over time. In all cases, only positive values were obtained for samples collected later than day 14 post symptom onset, in accordance with other reports<sup>33-35</sup>. Consistent with other reports<sup>35</sup>, Sars-CoV-2 specific IgM was not detected notably earlier than the two other antibody classes in our measurements. At the earlier time points (up to day 14), a similar or higher proportion of positive samples was detected by IF compared to ELISA for IgA and IgG, respectively. Although the sample size used here is too small to allow a firm conclusion, these results suggest that the sensitivity of IgG detection by the semi-quantitative IF approach is higher than that of an approved semi-quantitative ELISA assay routinely used in diagnostic labs.

## Discussion

Here, we describe the development of a semi-quantitative IF based assay for detection of Sars-CoV-2 specific antibodies in human samples that complements available ELISA-based testing systems and thereby enhances the selectivity of detection. Specificity of detection is essential in a current setting of relatively low Sars-CoV-2 antibody prevalence<sup>13-15</sup> in conjunction with high prevalence of potentially cross-reactive anti-ccCoV antibodies in a global population<sup>16</sup>. By combining two technically different serological assays, IF and ELISA, and classifying as “positive hits” only those that scored positive in both assays, we achieved maximum specificity in our negative control test cohorts. With this approach, high sensitivity was still achieved as all positive control samples from COVID-19 patients collected later than 14 days post symptom onset tested positive in both assays. This approach will serve as a principle for our future serological studies.

A major advantage of the IF based assay presented here is that the specimens used for detection present the entire viral proteome expressed under near-native conditions, while ELISA or chemiluminescent approaches use a single recombinantly expressed antigen. Both the N and S protein of coronaviruses are highly immunogenic, and it is assumed that antibodies binding to the receptor binding domain on the S1 subunit are most relevant for neutralization. However, the relative importance of antibodies directed against the N protein for potential protective immunity against Sars-CoV-2 is currently unclear. Other Sars-Cov-2 structural and non-structural proteins might also play a role in immune response as it was shown for proteins 3a and 9b of closely related Sars-Cov<sup>36</sup>. In addition, expression of the viral proteome in permissive cells ensures the correct protein folding and the presence of post-translational modification pattern such as glycosylation. Alterations in post-translational modifications are likely to influence the ability of serum antibodies to bind to different viral epitopes as it was shown for other viruses such as HIV<sup>37</sup>. The high information content of the IF data (differential staining patterns) or the implementation of stable cell lines expressing selected viral antigens in the IF assay will provide additional parameters for classification of patient sera. By combining such cell lines with spectral unmixing microscopy<sup>38</sup> it would be not only possible to simultaneously determine the level of all three major classes of antibodies (IgM, IgG and IgA) but also to determine the identity of viral antigens recognized in a single multiplexed approach. Using recombinant cell lines will also allow to implement automated cell seeding and immunostaining pipelines already established in the field of high-content screening microscopy<sup>39</sup>, thereby enabling true high-throughput application.

High sensitivity and exclusive specificity of serological assays are inversely correlated, making it necessary to balance to some degree between these two desirable properties. Depending on the context of a study and the questions to be addressed, sensitivity or specificity may be of higher importance. The automated image analysis protocol developed here allows the user to adapt the classification according to the study needs, putting more weight on either one of the parameters.

Finally, the described analysis pipeline can be applied for serological analysis of other virus infections, provided that there is an infectable cell line and a staining procedure that allows differentiating between infected and non-infected cells in the sample.

# Methods

## *Human material*

Negative control serum samples (n=219) were collected for various serological testing in the routine laboratory of the Center of Infectious Diseases, University Hospital Heidelberg between 2015 and 2019, before the start of the SARS-CoV-2 outbreak. Samples used corresponded to pseudonymized remaining material from the archive of the Center of Infectious Diseases. Sars-CoV-2 positive sera were collected from 29 PCR confirmed symptomatic COVID-19 inpatients (n=17) or outpatients (n=12) treated at the University Hospital Heidelberg under general informed consent (ethics votum no S-148/2020, University Hospital Heidelberg). Days post symptom onset were defined based on the anamnesis carried out upon admission. Serum samples were stored at -20°C until use.

## *Virus stock production*

VeroE6 cells were cultured in Dulbecco's modified Eagle medium (DMEM, Life Technologies) containing 10% fetal bovine serum, 100 U/mL penicillin, 100 µg/mL streptomycin and 1% non-essential amino acids (complete medium).

SARS-CoV-2 virus stocks were produced by amplification of the BavPat1/2020 strain (European Virus Archive) in VeroE6 cells. To generate the seed virus (passage 3), VeroE6 cells were infected with the original virus isolate, received as passage 2, at an MOI of 0.01. At 48 h post infection (p.i.), the supernatant was harvested and cell debris was removed by centrifugation at 800xg for 10 min. For production of virus stocks (passage 4), 500µl of the seed virus was used to infect 9E+06 VeroE6 cells. The resulting supernatant was harvested 48h later as described above. Virus titers were determined by plaque assay. Briefly, 2.5E+06 VeroE6 cells were plated into 24 well plates. 24 h later, cells were infected with serial dilutions of SARS-CoV-2 for 1 h. Inoculum was then removed and the cells were overlaid with serum free DMEM containing 0.8% carboxymethylcellulose. At 72 h. p.i., cells were fixed with 5% formaldehyde for 1 h followed by staining with 1% Crystal violet solution. Plaque forming units per ml (PFU/ml) were estimated by manual counting of the viral plaques. Stock solutions were stored in aliquots at -80°C until use for infection experiments.

## *Infection of cells and immunofluorescence staining*

In order to find a suitable cell line for our application, we performed pre-experiments comparing different cell lines with respect to their susceptibility to Sars-CoV-2 infection. Cells were seeded on glass coverslips and infected on the following day with SARS-CoV-2 strain BavPat1/2020 for 16h at MOI 0.01. Cells were fixed with 6%PFA in PBS, followed by permeabilization with 0.5% Triton X100 in PBS and then subjected to a standard immunofluorescence staining protocol as described in materials and methods. Only very few infected cells were detected in the case of hepatocyte-derived carcinoma cells (HUH-7), human embryonic kidney (HEK293T) and human alveolar basal epithelial (A549) cells (Supplementary Figure 1). Calu-3 cells grew in small clumps, often on top of each other which impacted our microscopy-based readout. In contrast, VeroE6 cells grew as a monolayer and were viable for at least 24h post infection. Based on these results, VeroE6 cells were chosen for all experiments in this manuscript.

For serum screening by IF microscopy, VeroE6 cells were seeded at a density of 7,000 cells per well into a black-wall glass-bottom 96 well plates (Corning, Product Number 353219) or on glass coverslips placed in a 24-well plate. 24 h after seeding, cells were infected with SARS-COV-2 at an MOI of 0.01 for 16 h. Cells were then fixed with 6% Formaldehyde for 1 h followed by washing 3x with phosphate buffered saline (PBS) under biosafety level 3. Afterwards, samples were handled under biosafety level 2. Cells were washed once in PBS containing 0,02% Tween 20 (Sigma) and permeabilized using 0,5% Triton X100 (Sigma) for 10 minutes. Samples were washed again and blocked using 2% powdered milk (Roth) in PBS for 20 min followed by two additional washing steps. All washing steps in a 96-well format were performed using the HydroFlex microplate washer (Tecan). Next, cells were incubated with patient serum (prediluted 1:1 in 0,4% Triton-X100 in PBS; further dilution 1:50 in PBS if not stated otherwise) and anti ds-RNA mouse monoclonal J2 antibody (Scicons, 1:4000) in PBS for 30 min at room temperature. After 3 washing steps, cognate secondary antibodies were applied for 20 min at room temperature. Goat anti-human IgG-AlexaFluor 488 (Invitogen, Thermofisher Scientific), goat anti-human IgA DyLight 650 (Abcam), goat anti-human IgM u chain (Invitogen, Thermofisher Scientific), for detecting immunoglobulins in human serum together with goat anti-mouse IgG-AlexaFluor 568 (Invitogen, Thermofisher Scientific) for dsRNA detection, all at 1:2000 dilution in PBS, have been used. After incubation with secondary antibodies cells were washed twice, stained with Hoechst (0,002µg/ml in PBS) for 3 minutes, washed again twice and stored at +4°C until imaging.

### *Microscopy*

Samples were imaged on motorized Nikon Ti2 widefield microscope using a Plan Apo lambda 20x/0.75 air objective and a back-illuminated EM-CCD camera (Andor iXon DU-888). To automatically acquire images in 96-well format, the JOBS module was used. The system was configured to acquire 9 images per well (in a regular 3 x 3 pattern centered in the middle of each well). The Perfect Focus System was used for autofocusing followed by a software-based fine focusing using the Hoechst signal in an axial range of 40um. Images were acquired in 4 channels using the following excitation/emission settings: Ex 377/50, Em 447/60 (Hoechst); Ex 482/35, Em 536/40 (AlexaFluor 488); Ex 562/40, Em 624/40 (AlexaFluor 568) and Ex 628/40, Em 692/40 (AlexaFluor 647 and DyLight 650). Exposure times were in the range between 50 and 100ms with EM gain between 50 and 150.

### *Enzyme linked immuno- sorbent assay (ELISA)*

ELISA measurements for determination of reactivity against the S1 domain of the viral spike protein were carried out using the Euroimmun Anti-SARS-CoV-2-ELISA (IgA) and Anti-SARS-CoV-2-ELISA (IgG) test kits (Euroimmun, Lübeck, Germany; EI 2606-9601 A and EI 2606-9601 G) run on an Euroimmun Analyzer I instrument according to the manufacturer's instructions. Optical densities measured for the samples were normalized using the value obtained for a calibrator sample provided in the test kit. The interpretation of the semi-quantitative ratiometric values obtained followed the manufacturer's protocol: values <0,8 were classified as negative, 0,8-1,1 as borderline, and values of 1,1 or higher as positive.

### *Image Analysis*

#### *Manual Annotations*

Two of our processing steps require manually annotated data: in order to train the convolutional neural network used for boundary and foreground prediction, we needed label masks for the individual cells. To determine suitable parameters for the infected cell classification, we needed a set of cells classified as being infected or non-infected. We have produced these annotations for 10 images with the following steps. First, we created an initial segmentation following the approach outlined in the Segmentation subsection, using boundary and foreground predictions from the ilastik<sup>40</sup> pixel classification workflow, which can be obtained from a few sparse annotations. We then corrected this segmentation using the annotation tool BigCat (<https://github.com/saalfeldlab/bigcat>). After correction, we manually annotated these cells as infected or non-infected. Note that this mode of annotations can introduce two types of bias: the



segmentation labels are derived from an initial segmentation. Small systematic errors in the initial segmentation that were not found during correction, could influence the boundary prediction network. More importantly, when annotating the infected / non-infected cells, both the serum channel and the virus marker channel have to be available to the annotators, in order to visually delineate the cells. This may result in subconscious bias, with the observed intensity in the serum channel influencing the decision on the infection status of a cell.

### *Preprocessing*

On all acquired images, we performed minimal preprocessing (i.e., flat-field correction) in order to compensate for uneven illumination of the microscope system<sup>41</sup>. First, we subtract a constant CCD camera offset (*ccd\_offset*). Secondly, we correct uneven illumination by dividing each channel by a corresponding corrector image (*flatfield(x, y)*), which was obtained as a normalized average of all images of that channel, smoothed by a normalized convolution with a Gaussian filter with a bandwidth of 30 pixels.

$$\text{processed}(x, y) = \frac{\text{raw}(x, y) - \text{ccd\_offset}}{\text{flatfield}(x, y) - \text{ccd\_offset}} \quad \text{Eq. 2}$$

This corrector image was obtained for all images of a given microscope set-up. Full background subtraction is performed later in the pipeline using either the background measured on wells that (deliberately) do not contain any serum or, if not available, using a fixed value that was determined manually.

### *Segmentation*

Cell segmentation forms the basis of our analysis method. In order to obtain an accurate segmentation, we make use of both the DAPI and the serum channel. First, we segment the nuclei on the DAPI channel using the StarDist method<sup>22</sup> trained on data from Caicedo et al. 2019<sup>42</sup>. Note that this method yields an *instance segmentation*: each nucleus in the image is assigned a unique id. In addition, we predict per pixel probabilities for the boundaries between cells and for the foreground (i.e. whether a given pixel is part of a cell) using a 2D U-Net<sup>23</sup> based on the implementation of Wolny et al. 2020<sup>24</sup>. This method was trained using the 9 annotated images, see above. The cells are then segmented by the seeded watershed algorithm<sup>21</sup>. We use the nucleus segmentation, dilated by 3 pixels, as seeds and the boundary predictions as the height map. In addition, we threshold the foreground predictions, erode the resulting binary image by 20 pixels and intersect it with the binarized seeds. The result is used as a foreground

mask for the watershed. The dilation / erosion is performed to alleviate issues with very small nucleus segments / imprecise foreground predictions. In order to evaluate this segmentation method, we train 9 different networks using leave-one-out cross-validation, training each network on 8 of the manually annotated images and evaluating it on the remaining one. We measure the segmentation quality using average precision<sup>25</sup> at an intersection over union (IoU) threshold of 0.5 as described in <https://www.kaggle.com/c/data-science-bowl-2018/overview/evaluation>. We measure a value of 0.77 +- 0.08 with the optimum value being 1.0.

### *Quantitation and Scoring*

#### *Infection classification*

To distinguish infected cells from control cells we use the dsRNA virus marker channel: infected cells show a signal in this channel while the non-infected control cells should ideally be invisible (see Figure 3). We classified each cell in the cell segmentation (see above) individually, using the following procedure. First, we denoised the marker channel using a white tophat filter with a radius of 20 pixels. To account for inaccuracies in the cell segmentation (the exact position of cell borders is not always clear), we then eroded all cell masks with a radius of 5 pixels and thereby discard pixels close to segment boundaries. This step does not lead to information loss, since the virus marker is mostly concentrated around the nuclei. On the remaining pixels of each cell, we compute the 0.95 quantile ( $q$ ) of the intensity in the marker channel. For the pixels that the neural network predicts to belong to the background ( $b$ ), we compute the median intensity of the virus marker channel across all images in the current plate. Finally, we classify the cell as infected if the 0.95 quantile of its intensity exceeds the median background by more than a given threshold:

$$q - \text{median}(b) > t \quad \text{Eq. 3}$$

For additional robustness against intensity variations we adapt the threshold based on the variation in the background in the plate. Hence, we define it as a multiple of the mean absolute deviation of all background pixels of that plate with  $N=4.8$ :

$$t = N \cdot \text{mad}(b) \quad \text{Eq. 4}$$

To determine the optimal values of the parameters used in our procedure, we used the cells manually annotated as infected / non-infected (see above). We performed grid search over the following parameter ranges:

- Quantile: 0.9, 0.93, 0.95, 0.96, 0.97, 0.98, 0.99, 0.995

- $N$ : 0 to 10 in intervals of 0.1

To estimate the validation accuracy, we performed leave-one-out cross-validation on the image level. This yields an average validation F1 score of 84.3%, precision of 84.3% and recall of 84.8%. These values are the arithmetic means of the individual results per split.

### *Immunoglobulin intensity measurements*

In order to obtain a relative measure of antibody binding, we determined the mean intensity and the integrated intensity in each segmented cell from images recorded in the IgG, IgA or IgM channel. A comparative analysis revealed that the mean intensity was more robust against the variability of cell sizes, whereas using the integrated intensity as a proxy yielded a higher variance in non-infected cells. Thus, mean intensity per cell was chosen as a proxy for the amount of antibody bound. Non-specific auto-fluorescence signals required a background correction of the measured average serum channel intensities. For background normalization, we used cells (one well per plate) which were not immunostained with primary antiserum. From this we computed the background to be the median serum intensity of all pixels of images taken from this well. This value was subtracted from all images recorded from the respective plate. In case this control well was not available, background was subtracted manually by selecting the area outside of cells in randomly selected wells and measuring the median intensity.

### *Scoring*

The core interest of the assay is to measure the difference of antibody binding to cells infected with the coronavirus in comparison to non-infected control cells. To this end, utilizing the results of the image analysis, we compute the following summary statistics of the background corrected antibody binding of infected cells,  $I$ , and of non-infected cells,  $N$ :

$$m_I = \text{median}(I) \quad \text{Eq. 5}$$

$$m_N = \text{median}(N) \quad \text{Eq. 6}$$

$$\sigma_N = \text{mad}(N) \quad \text{Eq. 7}$$

Using these, the ratio  $r$ , difference  $d$  and robust z score  $z$  are computed:  $r = \frac{m_I}{m_N}$  Eq. 8

$$d = m_I - m_N \quad \text{Eq. 9}$$

$$z = \frac{m_I - m_N}{\sigma_N} \quad \text{Eq. 10}$$

We compute above scores for each well and each image, taking into account only the cells that passed all quality control criteria (see below). While the final readout of the assay is well-based, image scores are useful for quality control.

### *Decision threshold selection*

In order to determine the presence of Sars-CoV-2 specific antibodies in patient sera, it was necessary to define a decision threshold  $r^*$ . If a measured intensity ratio  $r$  is above a decision threshold  $r^*$  than the serum would be characterized as positive for Sars-CoV-2 antibodies. For this an ROC analysis was performed<sup>31</sup>. Each possible choice of  $r^*$  for a test corresponds to a particular sensitivity/specificity pair. By continuously varying the decision threshold, we measured all possible sensitivity/specificity pairs, known as ROC curves (Supplementary Figure 7). To determine the appropriate  $r^*$  we considered two factors<sup>29</sup>:

- The undesirability of errors or relative cost of false-positive and false-negative classifications
- The prevalence, or prior probability of disease

These factors can be combined to calculate a slope in the ROC plot<sup>29-31</sup>

$$m = \frac{(\text{falsepositivecost}) (1 - P)}{(\text{falsenegativecost}) P} \quad \text{Eq. 11}$$

where  $P$  is the prevalence or prior probability of disease.

The optimal decision threshold  $r^*$ , given the false-positive/false-negative cost ratio and prevalence, is the point on the ROC curve where a line with slope  $m$  touches the curve. As discussed in the main text, a major concern regarding serological assays for Sars-CoV-2 antibody detection is the occurrence of false-positive results. Therefore, we choose  $m$  to be larger than one in our analysis. In particular, we determine  $r^*$  for the choice of  $m=10$  (see Supplementary Figure 7).

### *Quality control*

We performed quality control of the images and analysis results at the level of wells, images and cells. The entities that did not pass quality control are not taken into account when computing the score during final analysis. We exclude wells that contain less than 100 non-infected cells, that have a median serum intensity of infected cells smaller than 3 times the noise level (measured by the median absolute deviation), or that have negative intensity ratios, which can happen due to the background subtraction. Out of 1.736 wells, 94 did not pass the quality control, corresponding to 5.4 % of wells. At the image level, we visually inspect all images and mark those that contain imaging artifacts using a viewer based on napari<sup>43</sup>. We distinguish the following types of artifacts during the visual inspection: empty, unstained or over-saturated images, as well as images covered by a large bright object. In addition, we automatically exclude images that contain less than 10 or more than 1000 cells. These thresholds are motivated by the observation that too few or too many cells often result from a problem in the assay. Thus, 296 of the total 15.624 images were excluded from further analysis, corresponding to 1.9 % of images. Out of these, 295 were manually marked as outliers and only a single one did not pass the subsequent automatic quality control. Finally, we automatically exclude segmented cells with a size smaller than 250 pixels or larger than 12.500 pixels that most likely correspond to segmentation errors. These limits were derived by the histogram of cell sizes investigated for several plates. Two percent of the approximate 5.5 million segmented cells did not pass this quality control. In addition, we have also inspected all samples scored as positives. For the IgA channel, we have found a dotted staining pattern in ten cases that produced positive hits based on intensity ratio in negative control cohorts, but does not appear to indicate a specific antibody response. We have also excluded these samples from further analysis.

### *Implementation*

In order to scale the analysis workflow to the large number of images produced by the assay, we implemented an open-source python library to run the individual analysis steps. This library allows rerunning experiments for a given plate for newly added data on demand and caches intermediate results in order to rerun the analysis from checkpoints in case of errors in one of the processing steps. To this end, we use a file layout based on hdf5<sup>44</sup> to store multi-resolution image data and tabular data. The processing steps are parallelized over the images of a plate if possible. We use efficient implementations for the U-Net<sup>24</sup>, StarDist<sup>22</sup> and the watershed algorithm (<http://ukoethe.github.io/vigra/>) as well as other image processing algorithms<sup>45</sup>. We use pytorch (<https://pytorch.org/>) to implement GPU-accelerated cell feature extraction. The total processing time for a plate (containing around 800 images) is about two hours and thirty

minutes using a single GPU and 8 CPU cores. In addition, the results of the analysis as well as meta-data associated with individual plates are automatically saved in a centralized MongoDB database (<https://www.mongodb.com>) at the end of the workflow execution. Apart from keeping track of the analysis outcome and meta-data, a user can save additional information about a given plate/well/image in the database conveniently using the PlateViewer (see below). All source code is available open source under the permissive MIT license at <https://github.com/hci-unihd/batchlib>.

### *Data visualization*

In order to explore the numerical results of our analysis together with the underlying image data we further developed a Fiji<sup>46</sup> based open-source software tool for interactive visualization of high-throughput microscopy data<sup>26</sup>. The PlateViewer links interactive results tables and configurable scatter plots (image and well based) with a plate view of all raw, processed and segmentation images. The PlateViewer is connected to the centralised database such that also image and well based metadata can be accessed. The viewer thus enables efficient visual inspection and scientific exploration of all relevant data of the presented assay.

### *Data availability*

1. The data from the IF assay are available in the BioImage Archive (<http://www.ebi.ac.uk/bioimage-archive>) under accession number S-BIAD24. This includes raw microscopy images, intermediate segmentation and infected cell classification results as well as quality control and final score results.

## Acknowledgements

We would like to thank Martin Weigert and Uwe Schmidt for their help with setting up prediction for StarDist. We would like to acknowledge Infectious Disease Imaging Platform (IDIP) at Center for Integrative Infectious Diseases Research (CIID) for microscopy support. We would like to thank EMBL, especially the EMBL IT Services Department for providing computational infrastructure and support, as well as Wolfgang Huber for discussions on computing image based scores and statistical tests. We thank the patients who participated in this study. We also thank Christian Drosten at the Charité, Berlin and the European Virus Archive (EVAg) for the provision of the SARS-CoV-2 strain BavPat1. This work was in part supported by the Deutsche Forschungsgemeinschaft (DFG, German Research Foundation) – Projektnummer 240245660 –

SFB 1129 project 5 (HGK), project 6 (BM), project 11 (RB), project 14 (SB), project 18 (MG) and project Z4 (FH) and by the Deutsches Zentrum fuer Infektionsforschung (VL: project TTU 04.705; RB: project TTU 05.705). SB is supported by the Heisenberg program (project number 415089553) and MLS is supported by the DFG (project number 41607209).

## References

1. Wu, F. *et al.* A new coronavirus associated with human respiratory disease in China. *Nature* **579**, 265–269 (2020).
2. Gorbalenya, A. E. *et al.* The species Severe acute respiratory syndrome-related coronavirus: classifying 2019-nCoV and naming it SARS-CoV-2. *Nat. Microbiol.* **5**, 536–544 (2020).
3. Zhou, P. *et al.* A pneumonia outbreak associated with a new coronavirus of probable bat origin. *Nature* **579**, 270–273 (2020).
4. Corman, V. M. *et al.* Detection of 2019 novel coronavirus (2019-nCoV) by real-time RT-PCR. *Eurosurveillance* **25**, 1–8 (2020).
5. Hsiang, S. *et al.* The effect of large-scale anti-contagion policies on the COVID-19 pandemic. *Nature* 1–9 (2020) doi:10.1038/s41586-020-2404-8.
6. Mizumoto, K., Kagaya, K., Zarebski, A. & Chowell, G. Estimating the asymptomatic proportion of coronavirus disease 2019 (COVID-19) cases on board the Diamond Princess cruise ship, Yokohama, Japan, 2020. *Eurosurveillance* **25**, 2000180 (2020).
7. Qiu, H. *et al.* Clinical and epidemiological features of 36 children with coronavirus disease 2019 (COVID-19) in Zhejiang, China: an observational cohort study. *Lancet Infect. Dis.* **20**, 689–696 (2020).
8. Weitz, J. S. *et al.* Modeling shield immunity to reduce COVID-19 epidemic spread. *Nat. Med.* 1–6 (2020) doi:10.1038/s41591-020-0895-3.
9. Wu, Z. & McGoogan, J. M. Characteristics of and Important Lessons From the Coronavirus Disease 2019 (COVID-19) Outbreak in China. *JAMA* **323**, 1239 (2020).
10. Castagnoli, R. *et al.* Severe Acute Respiratory Syndrome Coronavirus 2 (SARS-CoV-2) Infection in Children and Adolescents. *JAMA Pediatr.* (2020) doi:10.1001/jamapediatrics.2020.1467.
11. Whitman, J. D. *et al.* Test performance evaluation of SARS-CoV-2 serological assays. *medRxiv* 2020.04.25.20074856 (2020) doi:10.1101/2020.04.25.20074856.
12. Meyer, B., Drosten, C. & Müller, M. A. Serological assays for emerging coronaviruses: Challenges and pitfalls. *Virus Res.* **194**, 175–183 (2014).
13. Bendavid, E. *et al.* COVID-19 Antibody Seroprevalence in Santa Clara County, California. *medRxiv* 2020.04.14.20062463 (2020) doi:10.1101/2020.04.14.20062463.



14. Lavezzo, E. *et al.* Suppression of COVID-19 outbreak in the municipality of Vo, Italy. *medRxiv* 2020.04.17.20053157 (2020) doi:10.1101/2020.04.17.20053157.
15. Stringhini, S. *et al.* Repeated seroprevalence of anti-SARS-CoV-2 IgG antibodies in a population-based sample from Geneva, Switzerland. *medRxiv* 2020.05.02.20088898 (2020) doi:10.1101/2020.05.02.20088898.
16. Severance, E. G. *et al.* Development of a nucleocapsid-based human coronavirus immunoassay and estimates of individuals exposed to coronavirus in a U.S. metropolitan population. *Clin. Vaccine Immunol.* **15**, 1805–1810 (2008).
17. Chan, P. K. S. *et al.* Immunofluorescence Assay for Serologic Diagnosis of SARS. *Emerg. Infect. Dis.* **10**, 530–532 (2004).
18. Liu, I. J. *et al.* Immunofluorescence assay for detection of the nucleocapsid antigen of the severe acute respiratory syndrome (SARS)-associated coronavirus in cells derived from throat wash samples of patients with SARS. *J. Clin. Microbiol.* **43**, 2444–2448 (2005).
19. Manopo, I. *et al.* Evaluation of a safe and sensitive Spike protein-based immunofluorescence assay for the detection of antibody responses to SARS-CoV. *J. Immunol. Methods* **296**, 37–44 (2005).
20. Ogando, N. *et al.* SARS-coronavirus-2 replication in Vero E6 cells: replication kinetics, rapid adaptation and cytopathology. *bioRxiv* 2020.04.20.049924 (2020) doi:10.1101/2020.04.20.049924.
21. Roerdink, J. B. T. M. & Meijster, A. The Watershed Transform: Definitions, Algorithms and Parallelization Strategies. *Fundam. Informaticae* **41**, 187–228 (2000).
22. Schmidt, U., Weigert, M., Broaddus, C. & Myers, G. Cell Detection with Star-Convex Polygons. in *Medical Image Computing and Computer Assisted Intervention – MICCAI 2018. MICCAI 2018. Lecture Notes in Computer Science* vol. 11071 LNCS 265–273 (Springer Verlag, 2018).
23. Ronneberger, O., Fischer, P. & Brox, T. U-Net: Convolutional Networks for Biomedical Image Segmentation. in *Lecture Notes in Computer Science (including subseries Lecture Notes in Artificial Intelligence and Lecture Notes in Bioinformatics)* vol. 9351 234–241 (Springer Verlag, 2015).
24. Wolny, A. *et al.* Accurate and Versatile 3D Segmentation of Plant Tissues at Cellular Resolution. *bioRxiv* 2020.01.17.910562 (2020) doi:10.1101/2020.01.17.910562.
25. Everingham, M., Van Gool, L., Williams, C. K. I., Winn, J. & Zisserman, A. The pascal visual object classes (VOC) challenge. *Int. J. Comput. Vis.* **88**, 303–338 (2010).
26. Tischer, C. & Pepperkok, R. PlateViewer: Fiji Plugin for Visual Inspection of High-Throughput Microscopy Based Image Data. (2019) doi:10.5281/zenodo.3522688.
27. Goossens, H. A. T., Nohlmans, M. K. E. & Van den Bogaard, A. E. J. M. Epstein-Barr virus and Cytomegalovirus infections cause false-positive results in IgM two-test protocol for early Lyme borreliosis [1]. *Infection* vol. 27 231 (1999).

28. Ladizinski, B. & Sankey, C. Acute Epstein-Barr virus infection and human immunodeficiency virus antibody cross-reactivity. *Am. J. Med.* **127**, e9 (2014).
29. Zweig, M. H. & Campbell, G. Receiver-operating characteristic (ROC) plots: a fundamental evaluation tool in clinical medicine. *Clin. Chem.* **39**, 561–577 (1993).
30. Linnet, K. A review on the methodology for assessing diagnostic tests. *Clin. Chem.* **34**, 1379–1386 (1988).
31. McNeil, B. J., Keeler, E. & Adelstein, S. J. Primer on Certain Elements of Medical Decision Making. *N. Engl. J. Med.* **293**, 211–215 (1975).
32. Lassaunière, R. *et al.* Evaluation of nine commercial SARS-CoV-2 immunoassays. *medRxiv* 2020.04.09.20056325 (2020) doi:10.1101/2020.04.09.20056325.
33. Okba, N. M. A. *et al.* Severe Acute Respiratory Syndrome Coronavirus 2–Specific Antibody Responses in Coronavirus Disease 2019 Patients. *Emerg. Infect. Dis.* **26**, (2020).
34. Wölfel, R. *et al.* Virological assessment of hospitalized patients with COVID-2019. *Nature* **581**, 465–469 (2020).
35. Long, Q. X. *et al.* Antibody responses to SARS-CoV-2 in patients with COVID-19. *Nat. Med.* 1–4 (2020) doi:10.1038/s41591-020-0897-1.
36. Qiu, M. *et al.* Antibody responses to individual proteins of SARS coronavirus and their neutralization activities. *Microbes Infect.* **7**, 882–889 (2005).
37. Pejchal, R. *et al.* A potent and broad neutralizing antibody recognizes and penetrates the HIV glycan shield. *Science (80-. )*. **334**, 1097–1103 (2011).
38. Zimmermann, T., Rietdorf, J. & Pepperkok, R. Spectral imaging and its applications in live cell microscopy. *FEBS Lett.* **546**, 87–92 (2003).
39. Pepperkok, R. & Ellenberg, J. High-throughput fluorescence microscopy for systems biology. *Nat. Rev. Mol. Cell Biol.* **7**, 690–696 (2006).
40. Berg, S. *et al.* ilastik: interactive machine learning for (bio)image analysis. *Nat. Methods* **16**, 1226–1232 (2019).
41. Tomazevic, D., Likar, B. & Pernus, F. Comparative evaluation of retrospective shading correction methods. *J. Microsc.* **208**, 212–223 (2002).
42. Caicedo, J. C. *et al.* Nucleus segmentation across imaging experiments: the 2018 Data Science Bowl. *Nat. Methods* **16**, 1247–1253 (2019).
43. Sofroniew, N. *et al.* Napari/Napari: 0.2.12. (2020) doi:10.5281/ZENODO.3689231.
44. Koranne, S. Hierarchical Data Format 5 : HDF5. in *Handbook of Open Source Tools* 191–200 (Springer US, 2011). doi:10.1007/978-1-4419-7719-9\_10.
45. van der Walt, S. *et al.* scikit-image: image processing in Python. *PeerJ* **2**, e453 (2014).

46. Schindelin, J. *et al.* Fiji: an open-source platform for biological-image analysis. *Nat. Methods* **9**, 676–682 (2012).

## Figures and tables

| <b>Negative cohort</b> | <b>IF IgM</b>   | <b>IF IgA</b>   | <b>IF IgG</b>   | <b>ELISA IgA</b>             | <b>ELISA IgG</b>            |
|------------------------|-----------------|-----------------|-----------------|------------------------------|-----------------------------|
| <b>B (n=105)</b>       | 1               | 0               | 1               | 7                            | 5                           |
| <b>A (n=34)</b>        | 0               | 0               | 1               | 1                            | 1                           |
| <b>Z (n=22)</b>        | 0               | 0               | 0               | 2                            | 0                           |
| <b>E (n=58)</b>        | 0               | 0               | 0               | 10                           | 1                           |
| <b>Total (n=219)</b>   | <b>1 (0,5%)</b> | <b>0 (0,0%)</b> | <b>2 (0,9%)</b> | <b>20<sup>a</sup> (9,1%)</b> | <b>7<sup>a</sup> (3,2%)</b> |

**Table 1: Summary of positive results for the negative control samples obtained by ELISA and IF.** The classification of positive or borderline results in ELISA followed the definition of the test manufacturer. The classification in IF is described in materials and methods. Positive IgA and IgG ELISA readings were derived from the same sample. <sup>a</sup> – borderline values were considered positive.

| <b>days post symptom onset</b> | <b>IF IgM</b>   | <b>IF IgA</b>   | <b>IF IgG</b>   | <b>ELISA IgA</b> | <b>ELISA IgG</b> |
|--------------------------------|-----------------|-----------------|-----------------|------------------|------------------|
| < 11 (n=17)                    | 8 (47%)         | 9 (53%)         | 7 (41%)         | 11 (65%)         | 3 (18%)          |
| 11-14 (n=25)                   | 18 (72%)        | 19 (76%)        | 19 (76%)        | 19 (76%)         | 16 (64%)         |
| >14 (n=16)                     | 16 (100%)       | 16 (100%)       | 16 (100%)       | 16 (100%)        | 16 (100%)        |
| <b>Total (n=57)</b>            | <b>42 (73%)</b> | <b>44 (77%)</b> | <b>42 (73%)</b> | <b>46 (80%)</b>  | <b>34 (60%)</b>  |

**Table 2: Positive results obtained for sera from COVID-19 patients collected at the indicated days post symptom onset.**

Figure 1.

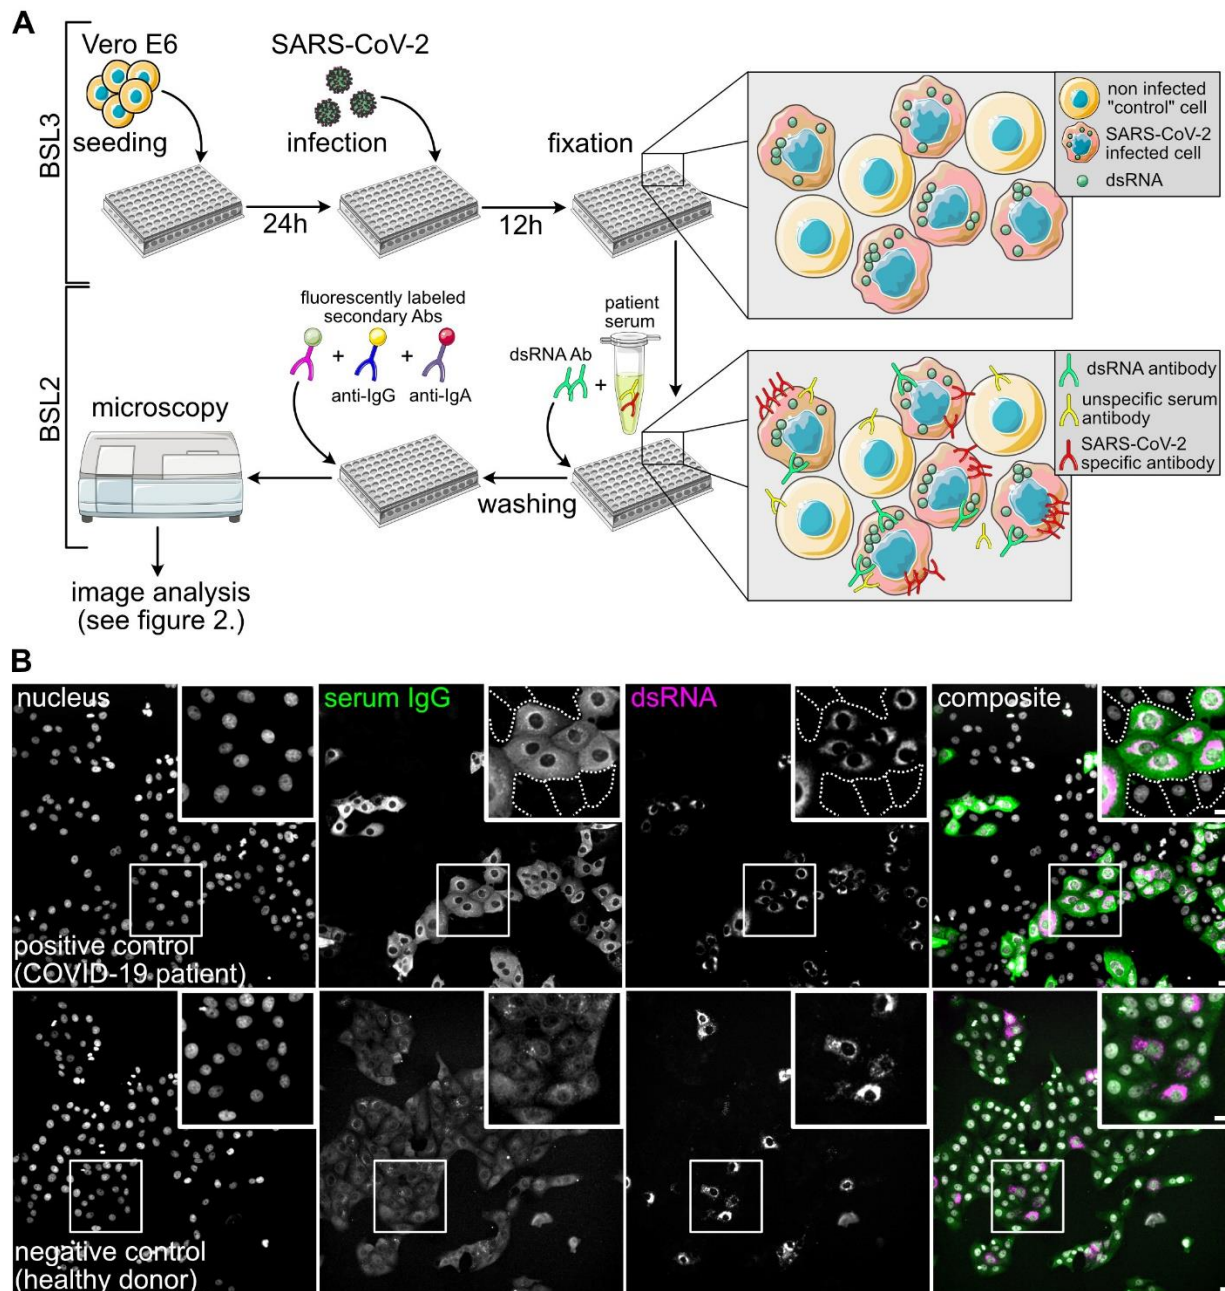

**Figure 1: Principle of the immunofluorescence assay for SARS-CoV-2 antibody detection.** (A) Scheme of the IF workflow and the concept for SARS-CoV-2 antibody detection. (B) Representative images showing immunofluorescence results using a COVID-19 patient serum (positive control, upper panels) and a negative control serum (lower panels), followed by staining with an AlexaFluor488-coupled anti-IgG secondary antibody. Nuclei (gray), IgG (green), dsRNA (magenta) channels and a composite image are shown. White boxes mark the zoomed areas.

Dashed lines mark borders of non-infected cells which are not visible at the chosen contrast setting. Note that the upper and lower panels are not recorded and displayed with the same brightness and contrast settings. In the lower panels the brightness and contrast scales have been expanded in order to visualize cells in the IgG serum channel where only background staining was detected. Scale bar is 20  $\mu\text{m}$  in overview and 10  $\mu\text{m}$  in the insets.



Figure 2.

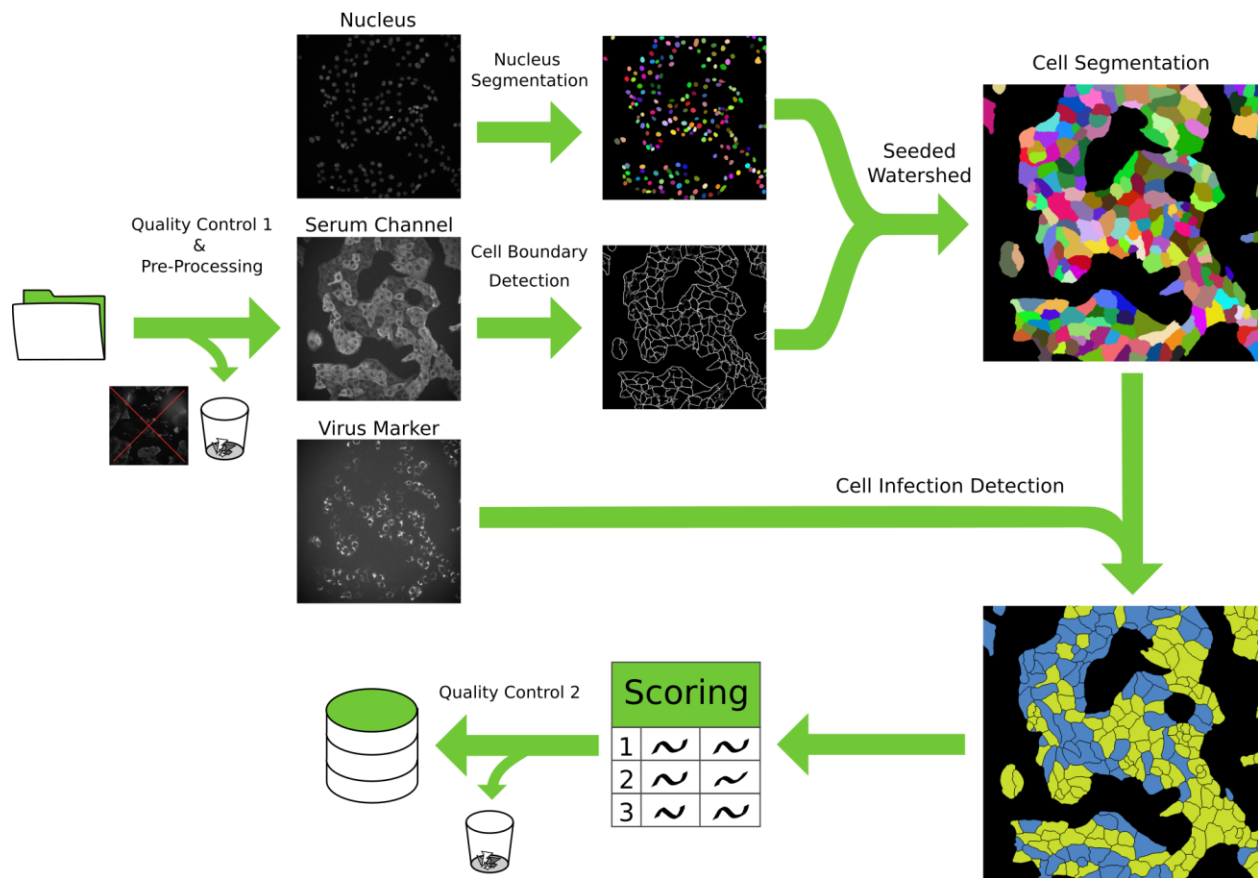

**Figure 2: Schematic overview of the image processing pipeline.** Initially, images are subjected to the first manual quality control, where images with acquisition defects are discarded. A pre-processing step is then applied to correct for barrel artifacts. Subsequently, segmentation is obtained via seeded watershed, this algorithm requires seeds obtained from StarDist segmentation of the nuclei and boundary evidence computed using a neural network. Lastly, using the virus marker channel we classify each cell as infected or not infected and we computed the scoring. A final automated quality control identifies and automatically discards non-conform results. All intermediate results are saved in a database for ensuring fully reproducibility of the results.

Figure 3.

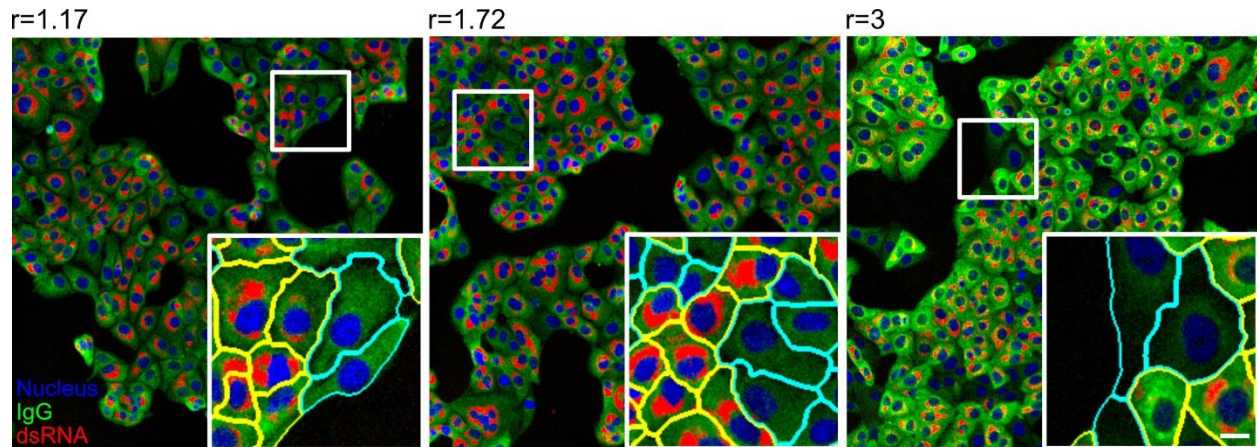

**Figure 3: Examples of results from the automated image analysis pipeline.** Panels display images that correspond to three different ratio scores (ratio score is indicated above the image) determined from samples stained with three different human sera, followed by staining with an anti-IgG secondary antibody coupled to AlexaFluore488. Images represent overlays of three channels - nuclei (blue), IgG (green) and dsRNA (red). White boxes mark the zoomed area. Cells in the insets are highlighted with yellow or cyan boundaries, indicating infected and non-infected cells, respectively. Scale bar = 10  $\mu\text{m}$ .

Figure 4.

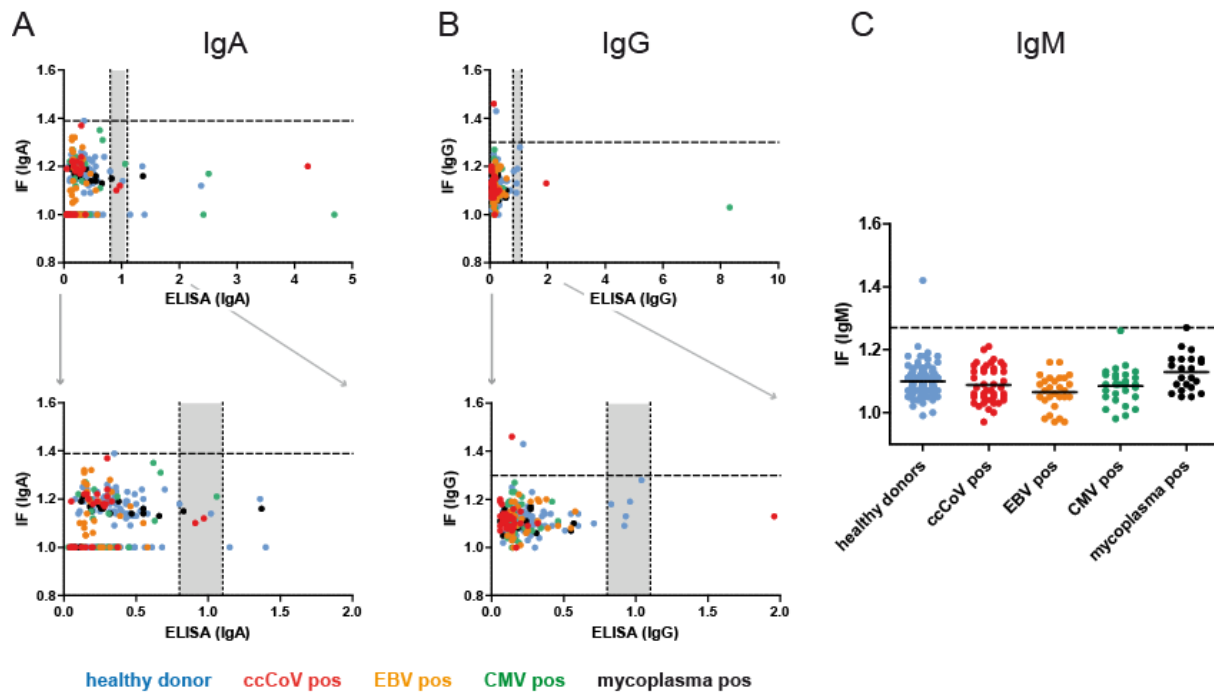

**Figure 4: Correlation between Sars-CoV-2 specific IF and ELISA results for the negative control panel obtained in IgA (A) or IgG (B) measurements.** Each dot represents one serum sample. Blue, healthy donors; red, ccCoV positive; green, CMV positive; orange, EBV positive; black, mycoplasma positive. Bottom panels represent zoomed-in versions of the respective top panel to illustrate the borderline region. **(C)** IgM values for the indicated negative control cohorts determined by IF. Since a corresponding IgM specific ELISA kit from Euroimmun was not available, correlation was not analyzed in this case. In some cases, antibody binding above background was undetectable by IF in non-infected as well as in infected cells, indicating low unspecific cross-reactivity and lack of specific reactivity of the respective serum. In order to allow for inclusion of these data points in the graph, the IF ratio was set to 1,0. Dotted lines indicate the optimal separation cut-off values defined for sample classification, gray areas indicate borderline results in ELISA.

Figure 5.

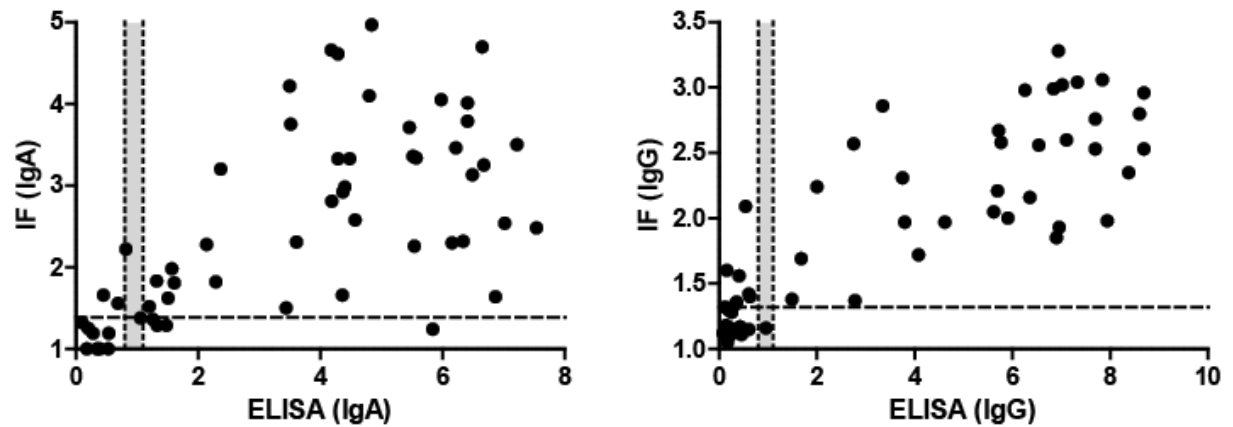

**Figure 5: Correlation between IgA or IgG values obtained by ELISA and IF for sera from 29 COVID-19 patients collected at different days post infection. Dotted lines indicate the cut-off values defined for classification of readouts, gray areas indicate borderline values.**

Figure 6.

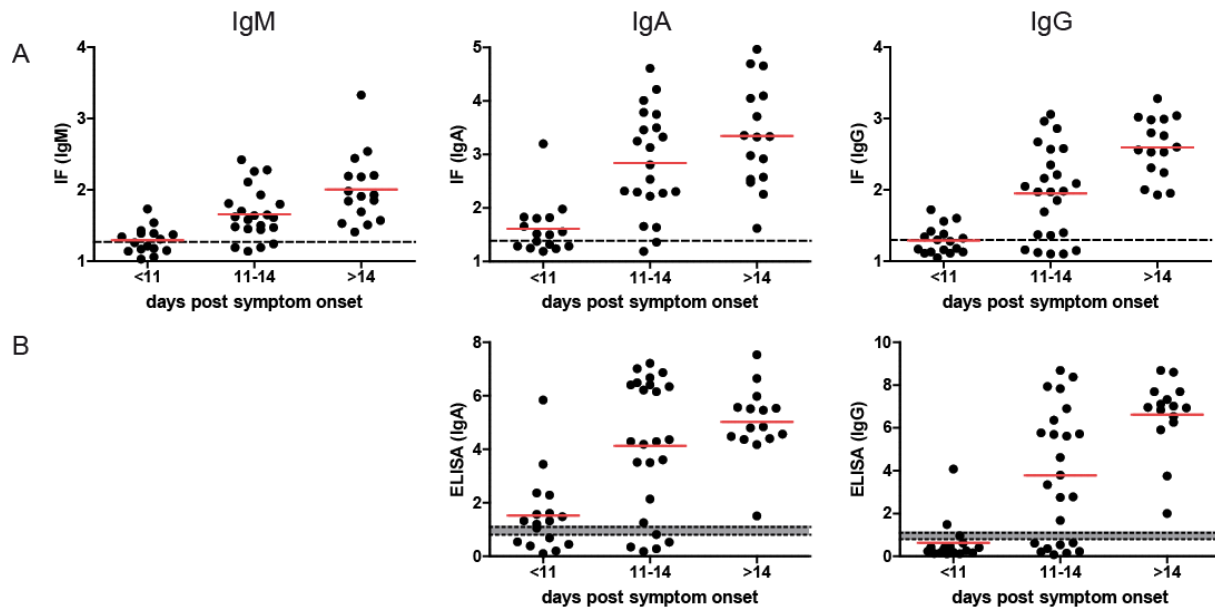

**Figure 6: Detection of Sars-CoV-2 specific antibodies in sera from COVID-19 patients. (A)** Fifty-seven serum samples from 29 PCR confirmed patients collected at the indicated times post symptom onset were analyzed by the IF workflow for the presence of Sars-CoV-2 specific IgM, IgA and IgG antibodies. Each dot represents one serum sample. Red line: mean value; dotted line: cut-off between negative and positive values. **(B)** The same samples as in A were analyzed by ELISA for the presence of Sars-CoV-2 specific IgA and IgG antibodies. Each dot represents one serum sample. Red line: mean value; dotted lines: cut-off; gray zone: borderline.
